# Supplementary material for: 1,7/8-Substituted isoquinoline derivatives: position isomerism caused by HIO3-induced dehydrogenation and solid-state fluorescence stimulus-responsive properties
Source: Royal Society of Chemistry journal article supplement (doi:10.1039/d2tc01336c), 2022-01-01
Supplement: d2tc01336c1.pdf [file d2tc01336c1.pdf]

## Electronic Supplementary Information

### 1,7/8-Substituted isoquinoline derivatives: position isomerism caused by HIO<sub>3</sub>-induced dehydrogenation and solid-state fluorescent stimulus-responsive properties

Xiangdong Han, Xiaoqing Liu, Nannan Liu, Wenxia Gao, Yunxiang Lei,\* Yunbing Zhou, Miaochang Liu, Huayue Wu\* and Xiaobo Huang\*

College of Chemistry and Materials Engineering, Wenzhou University, Wenzhou, 325035, P. R. China

E-mail: yunxianglei@wzu.edu.cn (Y. Lei), huayuewu@wzu.edu.cn (H. Wu), xiaobhuang@wzu.edu.cn (X. Huang)

#### Contents:

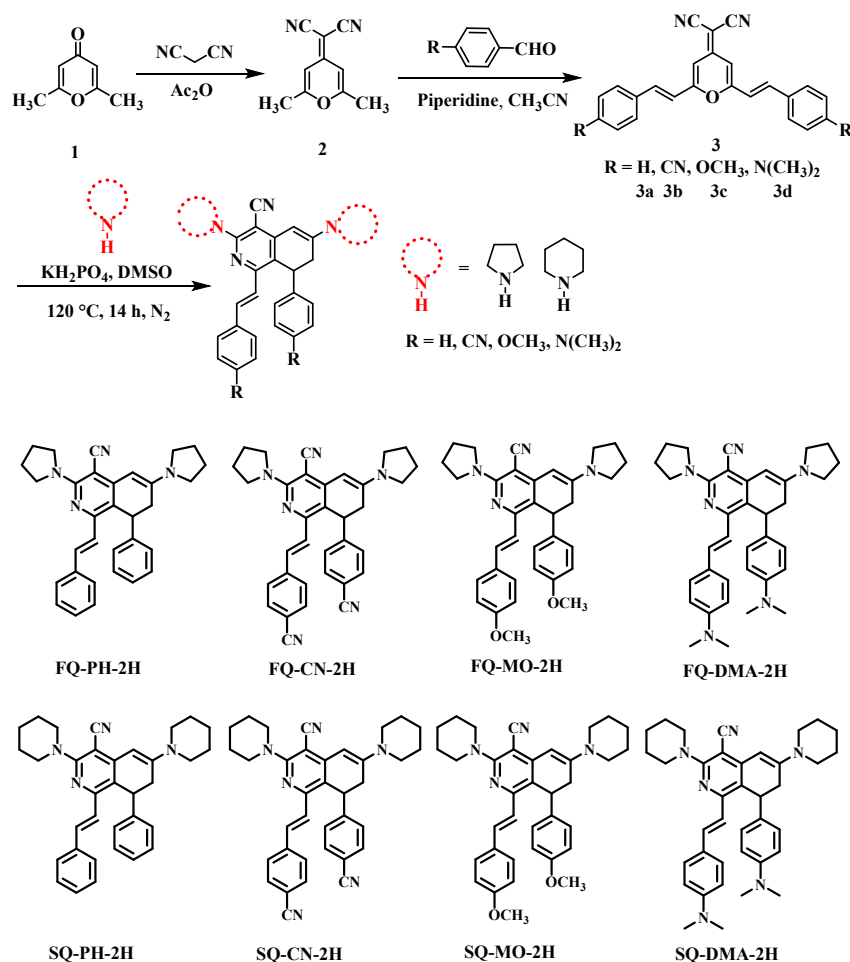

Scheme S1 Synthesis of various 7,8-dihydroisoquinoline derivatives.

## 1. Experimental

### 1.1 Measurements and materials

<sup>1</sup>H and <sup>13</sup>C NMR spectra were performed with a Bruker DRX 500/400 NMR spectrometer or a Bruker DRX 400 NMR spectrometer. HRMS-ESI mass spectra were performed with a Hitachi Nano Frontier LD spectrometer. Absorption spectra were performed with a UV-3600 Shimadzu spectrophotometer. Fluorescence spectra were conducted on a HITACHI F-7000 fluorometer. Fluorescence quantum yields ( $\Phi_F$ ) in solid state were conducted on a FluoroMax-4 (Horiba Jobin Yvon) fluorometer. Single-crystal X-ray diffraction measurements were obtained on a Bruker-Nonius Smart Apex CCD diffractometer with graphite monochromated Mo K $\alpha$  radiation. 2-(2,6-Dimethyl-4*H*-pyran-4-ylidene)malononitrile (**2**) was synthesized by the reaction of 2,6-dimethyl-4*H*-pyran-4-one (**1**) and malononitrile in the presence of acetic anhydride according to the previous report (Scheme S1).<sup>[1]</sup> 2-(2,6-di(*E*-Styryl)-4*H*-pyran-4-ylidene)malononitrile (**3a**), 2-(2,6-bis(*E*-4-cyanostyryl)-4*H*-pyran-4-ylidene)malononitrile (**3b**), 2-(2,6-bis(*E*-4-methoxystyryl)-4*H*-pyran-4-ylidene)malononitrile (**3c**), and 2-(2,6-bis(*E*-4-(dimethylamino)styryl)-4*H*-pyran-4-ylidene)malononitrile (**3d**) were synthesized using compound **2** and the corresponding aromatic aldehydes as the materials according to the previous literature.<sup>[2]</sup> (*E*)-8-Phenyl-3,6-di(pyrrolidin-1-yl)-1-styryl-7,8-dihydroisoquinoline-4-carbonitrile (**FQ-Ph-2H**), (*E*)-8-phenyl-3,6-di(piperidin-1-yl)-1-styryl-7,8-dihydroisoquinoline-4-carbonitrile (**SQ-Ph-2H**), (*E*)-8-(4-methoxyphenyl)-1-(4-methoxystyryl)-3,6-di(piperidin-1-yl)-7,8-dihydroisoquinoline-4-carbonitrile (**SQ-MO-2H**), and (*E*)-8-(4-(dimethylamino)phenyl)-1-(4-(dimethylamino)styryl)-3,6-di(piperidin-1-yl)-7,8-dihydroisoquinoline-4-carbonitrile (**SQ-DMA-2H**) were synthesized according to the previous literature,<sup>[2]</sup> using compound **3** and as pyrrolidine/piperidine the materials.

## 1.2 General procedure for 7,8-dihydroisoquinoline derivatives FQ-CN-2H, FQ-MO-2H, FQ-DMA-2H, and SQ-CN-2H.

A mixture of compound **3b/3c/3d** (5.0 mmol), pyrrolidine/piperidine (20.0 mmol), KH<sub>2</sub>PO<sub>4</sub> (15.0 mmol), and DMSO (15.0 mL) was stirred at 120 °C for 14 h under N<sub>2</sub> atmosphere. After being cooled to the room temperature, the reaction mixture was poured into CH<sub>2</sub>Cl<sub>2</sub> (100 mL), and the organic layer was washed with water (50 mL) for three times, and then dried over Na<sub>2</sub>SO<sub>4</sub>. After removal of solvent under reduced pressure, the residue was purified by flash chromatography on silica gel to afford the corresponding product.

**(*E*)-8-(4-Cyanophenyl)-1-(4-cyanostyryl)-3,6-di(pyrrolidin-1-yl)-7,8-dihydroisoquinoline-4-carbonitrile (FQ-CN-2H).** Following the general procedure, using petroleum ether/ethyl acetate (4:1, v/v) as the eluent to afford a red solid (1.23 g, 46% yield). <sup>1</sup>H NMR (CDCl<sub>3</sub>, 500 MHz):  $\delta$  7.70 (d,  $J$  = 15.5 Hz, 1H), 7.62 (d,  $J$  = 8.0 Hz, 2H), 7.52 (d,  $J$  = 7.5 Hz, 2H), 7.35 (d,  $J$  = 8.0 Hz, 2H), 6.93-6.88 (m, 3H), 5.13 (s, 1H), 4.07 (s, 1H), 3.80-3.77 (m, 5H), 3.38-3.35 (m, 2H), 3.12-3.08 (m, 1H), 2.13-2.03 (m, 9H) ppm. <sup>13</sup>C NMR (CDCl<sub>3</sub>, 125 MHz): 163.8, 163.5, 155.8, 144.8, 141.9, 141.3, 132.4, 131.7, 131.5, 130.0, 127.6, 127.5, 121.1, 119.9, 118.8, 118.6, 111.2, 110.6, 96.0, 78.1, 49.5, 48.6, 47.2, 37.1, 25.5 ppm.

**(E)-8-(4-Methoxyphenyl)-1-(4-methoxystyryl)-3,6-di(pyrrolidin-1-yl)-7,8-dihydroisoquinoline-4-carbonitrile (FQ-MO-2H).** Following the general procedure, using petroleum ether/ethyl acetate (5:1, v/v) as the eluent to afford a yellow solid (0.92 g, 32% yield). <sup>1</sup>H NMR (CDCl<sub>3</sub>, 500 MHz): δ 7.69 (d, *J* = 14.5 Hz, 1H), 7.36 (d, *J* = 7.5 Hz, 2H), 7.07 (d, *J* = 6.5 Hz, 2H), 6.93 (d, *J* = 15.0 Hz, 1H), 6.84 (d, *J* = 7.5 Hz, 2H), 6.75 (d, *J* = 7.5 Hz, 2H), 5.46 (s, 1H), 4.42 (d, *J* = 6.5 Hz, 1H), 3.85 (br, 4H), 3.80 (s, 3H), 3.73 (s, 3H), 3.30 (br, 4H), 2.98-2.84 (m, 2H), 1.97-1.85 (m, 8H) ppm. <sup>13</sup>C NMR (CDCl<sub>3</sub>, 125 MHz): 159.6, 157.9, 156.7, 152.3, 151.1, 150.9, 135.8, 134.2, 129.9, 128.5, 128.3, 1219., 120.6, 113.9, 113.7, 113.1, 90.6, 81.2, 55.2, 55.0, 48.8, 47.6, 36.4, 34.7, 25.6, 24.9 ppm.

**(E)-8-(4-(Dimethylamino)phenyl)-1-(4-(dimethylamino)styryl)-3,6-di(pyrrolidin-1-yl)-7,8-dihydroisoquinoline-4-carbonitrile (FQ-DMA-2H).** Following the general procedure, using petroleum ether/ethyl acetate (10:1, v/v) as the eluent to afford a yellow solid (1.51 g, 52% yield). <sup>1</sup>H NMR (CDCl<sub>3</sub>, 500 MHz): δ 7.68 (d, *J* = 15.5 Hz, 1H), 7.34 (d, *J* = 8.0 Hz, 2H), 7.03 (d, *J* = 8.0 Hz, 2H), 6.91 (d, *J* = 15.0 Hz, 1H), 6.64 (d, *J* = 8.5 Hz, 2H), 6.59 (d, *J* = 8.0 Hz, 2H), 5.45 (s, 1H), 4.39 (d, *J* = 7.0 Hz, 1H), 3.85 (br, 4H), 3.32 (br, 4H), 2.96 (s, 6H), 2.93-2.89 (m, 2H), 2.87 (s, 6H), 1.96-1.85 (m, 8H) ppm. <sup>13</sup>C NMR (CDCl<sub>3</sub>, 125 MHz): 156.7, 152.2, 151.3, 150.3, 149.0, 134.8, 131.9, 130.4, 128.5, 128.0, 125.6, 120.9, 119.8, 113.3, 112.6, 112.0, 90.7, 80.9, 48.9, 47.6, 40.62, 40.58, 40.32, 40.28, 36.3, 34.7, 25.7, 25.0 ppm.

**(E)-8-(4-Cyanophenyl)-1-(4-cyanostyryl)-3,6-di(piperidin-1-yl)-7,8-dihydroisoquinoline-4-carbonitrile (SQ-CN-2H).** Following the general procedure, using petroleum ether/ethyl acetate (10:1, v/v) as the eluent to afford a yellow solid (2.28 g, 80% yield). <sup>1</sup>H NMR (CDCl<sub>3</sub>, 500 MHz): δ 7.74 (d, *J* = 15.0 Hz, 1H), 7.64 (d, *J* = 7.5 Hz, 2H), 7.56 (d, *J* = 7.5 Hz, 2H), 7.34 (d, *J* = 7.5 Hz, 2H), 6.95 (d, *J* = 8.5 Hz, 3H), 5.37 (s, 1H), 4.11 (s, 1H), 3.57 (br, 4H), 3.56 (br, 5H), 3.01-2.98 (m, 1H), 1.73-1.66 (m, 12H) ppm. <sup>13</sup>C NMR (CDCl<sub>3</sub>, 125 MHz): 165.9, 165.2, 160.6, 144.6, 141.4, 141.0, 132.3, 132.1, 131.3, 130.2, 127.5, 127.1, 123.7, 118.8, 118.6, 118.5, 111.2, 110.5, 97.90, 97.86, 82.8, 49.8, 45.6, 38.1, 29.6, 25.8, 25.5, 24.6, 23.9 ppm.

### 1.3 General procedure for the target isoquinoline derivatives

A mixture of various 7,8-dihydroisoquinoline derivatives (1.0 mmol), hydroiodic acid (1.2 mmol), acetonitrile (10.0 mL) was stirred at 80 °C for 45 min. After being cooled to the room temperature, the solvent was removed under reduced pressure and the residue was purified by flash chromatography on silica gel to afford the corresponding product.

**(E)-8-Phenyl-3,6-di(pyrrolidin-1-yl)-1-styrylisoquinoline-4-carbonitrile (FQ-Ph-8).** Following the general procedure, using petroleum ether/ethyl acetate (10:1, v/v) as the eluent to afford a yellow solid (409.5 mg, 84% yield). <sup>1</sup>H NMR (CDCl<sub>3</sub>, 500 MHz): δ 7.54 (d, *J* = 15.5 Hz, 1H), 7.45-7.37 (m, 5H), 7.19-7.18 (m, 3H), 6.93-6.91 (m, 2H), 6.79 (d, *J* = 2.0 Hz, 1H), 6.67 (d, *J* = 15.0 Hz, 1H), 6.62 (d, *J* = 2.0 Hz, 1H), 3.94 (br, 4H), 3.50 (t, *J* = 6.5 Hz, 4H), 2.08-2.04 (m, 8H) ppm. <sup>13</sup>C NMR (CDCl<sub>3</sub>, 125 MHz): 155.3, 154.6, 148.5, 144.2, 143.7, 142.9, 136.5, 133.9, 129.2,

128.5, 128.2, 127.4, 127.3, 120.7, 116.3, 112.6, 98.9, 76.2, 48.9, 47.6, 25.5, 25.3 ppm. HRMS (ESI) m/z: [M+H]<sup>+</sup> calculated for C<sub>32</sub>H<sub>31</sub>N<sub>4</sub>, 471.2543; found, 471.2537.

**(E)-8-(4-Cyanophenyl)-1-(4-cyanostyryl)-3,6-di(pyrrolidin-1-yl)isoquinoline-4-carbonitrile (FQ-CN-8).** Following the general procedure, using petroleum ether/ethyl acetate (10:1, v/v) as the eluent to afford a red solid (200.1 mg, 37% yield). <sup>1</sup>H NMR (CDCl<sub>3</sub>, 500 MHz): δ 7.71 (d, *J* = 8.0 Hz, 2H), 7.53 (t, *J* = 6.5 Hz, 4H), 7.48 (d, *J* = 14.5 Hz, 1H), 6.95 (d, *J* = 8.0 Hz, 2H), 6.81 (d, *J* = 2.0 Hz, 1H), 6.56 (d, *J* = 2.0 Hz, 1H), 6.52 (d, *J* = 15.0 Hz, 1H), 3.94 (br, 4H), 3.49 (t, *J* = 6.0 Hz, 4H), 2.10-2.04 (m, 8H) ppm. <sup>13</sup>C NMR (CDCl<sub>3</sub>, 125 MHz): 155.0, 154.3, 148.5, 144.5, 140.7, 140.5, 132.4, 132.3, 132.2, 131.6, 130.1, 127.3, 120.3, 118.7, 118.4, 116.5, 116.4, 112.3, 111.7, 111.4, 99.6, 49.1, 47.8, 25.6, 25.5 ppm. HRMS (ESI) m/z: [M+H]<sup>+</sup> calculated for C<sub>34</sub>H<sub>29</sub>N<sub>6</sub>, 521.2448; found, 521.2452.

**(E)-8-(4-Methoxyphenyl)-1-(4-methoxystyryl)-3,6-di(pyrrolidin-1-yl)isoquinoline-4-carbonitrile (FQ-MO-8).** Following the general procedure, using petroleum ether/ethyl acetate (15:1, v/v) as the eluent to afford a yellow solid (182.2 mg, 33% yield). <sup>1</sup>H NMR (CDCl<sub>3</sub>, 500 MHz): δ 7.92 (d, *J* = 15.5 Hz, 1H), 7.82 (s, 1H), 7.62 (d, *J* = 15.0 Hz, 1H), 7.39 (d, *J* = 7.5 Hz, 2H), 7.02 (s, 1H), 6.96 (d, *J* = 8.0 Hz, 2H), 6.91 (d, *J* = 7.5 Hz, 2H), 3.99 (br, 4H), 3.88 (s, 3H), 3.84 (s, 3H), 3.09 (br, 4H), 2.04 (br, 4H), 1.81 (br, 4H) ppm. <sup>13</sup>C NMR (CDCl<sub>3</sub>, 125 MHz): 160.2, 158.5, 155.3, 155.1, 151.0, 141.4, 137.0, 134.9, 130.2, 129.4, 129.1, 128.7, 120.8, 119.9, 114.1, 113.8, 113.5, 102.9, 76.2, 55.3, 55.2, 51.1, 49.0, 25.58, 25.56 ppm. HRMS (ESI) m/z: [M+H]<sup>+</sup> calculated for C<sub>34</sub>H<sub>35</sub>N<sub>4</sub>O<sub>2</sub>, 531.2755; found, 531.2749.

**(E)-7-(4-(Dimethylamino)phenyl)-1-(4-(dimethylamino)styryl)-3,6-di(pyrrolidin-1-yl)isoquinoline-4-carbonitrile (FQ-DMA-7).** Following the general procedure, using petroleum ether/ethyl acetate (15:1, v/v) as the eluent to afford an orange solid (333.3 mg, 56% yield). <sup>1</sup>H NMR (CDCl<sub>3</sub>, 400 MHz): δ 7.94 (d, *J* = 15.2 Hz, 1H), 7.85 (s, 1H), 7.58-7.52 (m, 3H), 7.36 (d, *J* = 8.0 Hz, 2H), 7.26 (s, 1H), 7.02 (s, 1H), 6.83 (br, 1H), 6.71 (d, *J* = 8.8 Hz, 2H), 3.98 (t, *J* = 5.6 Hz, 4H), 3.12 (t, *J* = 5.2 Hz, 4H), 3.03 (s, 6H), 3.02 (s, 6H), 2.03 (t, *J* = 6.8 Hz, 4H), 1.81 (t, *J* = 7.6 Hz, 4H) ppm. <sup>13</sup>C NMR (CDCl<sub>3</sub>, 125 MHz): 155.6, 155.5, 151.1, 150.7, 149.2, 141.2, 137.6, 130.7, 129.8, 129.1, 129.0, 124.8, 121.1, 117.5, 113.9, 112.0, 111.9, 102.8, 75.6, 51.1, 48.9, 40.6, 40.5, 40.19, 40.15, 25.59, 25.56 ppm. HRMS (ESI) m/z: [M+H]<sup>+</sup> calculated for C<sub>36</sub>H<sub>41</sub>N<sub>6</sub>, 557.3387; found, 557.3380.

**(E)-8-Phenyl-3,6-di(piperidin-1-yl)-1-styrylisoquinoline-4-carbonitrile (SQ-Ph-8).** Following the general procedure, using petroleum ether/ethyl acetate (15:1, v/v) as the eluent to afford a yellow solid (222.2 mg, 40% yield). <sup>1</sup>H NMR (CDCl<sub>3</sub>, 500 MHz): δ 7.59 (d, *J* = 15.0 Hz, 1H), 7.44-7.41 (m, 5H), 7.20-7.16 (m, 4H), 6.96-6.92 (m, 3H), 6.64 (d, *J* = 15.5 Hz, 1H), 3.90 (br, 4H), 3.47 (br, 4H), 1.79-1.69 (m, 12H) ppm. <sup>13</sup>C NMR (CDCl<sub>3</sub>, 125 MHz): 158.6, 155.0, 151.8, 144.3, 143.5, 142.4, 136.6, 134.0, 129.2, 128.6, 128.2, 128.1, 127.5, 127.3, 119.7, 118.7, 114.5, 102.3, 80.1, 49.3, 48.6, 26.2, 25.4, 24.8, 24.3 ppm. HRMS (ESI) m/z: [M+H]<sup>+</sup> calculated for C<sub>34</sub>H<sub>35</sub>N<sub>4</sub>, 499.2856; found, 499.2850.

**(E)-8-(4-Cyanophenyl)-1-(4-cyanostyryl)-3,6-di(piperidin-1-yl)isoquinoline-4-carbonitrile (SQ-CN-8).** Following the general procedure, using petroleum ether/ethyl acetate (10:1, v/v) as the eluent to afford a yellow solid (171.1 mg, 31% yield). <sup>1</sup>H NMR (CDCl<sub>3</sub>, 500 MHz): δ 7.72 (d, *J* = 8.0 Hz, 2H), 7.56-7.48 (m, 5H), 7.17 (s, 1H), 6.96 (d, *J* = 8.0 Hz, 3H), 6.51 (d, *J* = 15.5 Hz, 1H), 3.89 (br, 4H), 3.48 (br, 4H), 1.76-1.70 (m, 12H) ppm. <sup>13</sup>C NMR (CDCl<sub>3</sub>, 125 MHz): 158.5, 153.5, 151.8, 148.1, 144.7, 140.6, 140.1, 132.4, 132.3, 131.2, 130.1, 129.4, 119.3, 119.0, 118.6, 118.3, 114.0, 111.8, 111.5, 103.0, 100.0, 80.4, 49.3, 48.7, 29.7, 26.2, 25.5, 24.8, 24.3 ppm. HRMS (ESI) *m/z*: [M+H]<sup>+</sup> calculated for C<sub>36</sub>H<sub>33</sub>N<sub>6</sub>, 549.2761; found, 549.2758.

**(E)-7-(4-Methoxyphenyl)-1-(4-methoxystyryl)-3,6-di(piperidin-1-yl)isoquinoline-4-carbonitrile (SQ-MO-7).** Following the general procedure, using petroleum ether/ethyl acetate (10:1, v/v) as the eluent to afford a yellow solid (329.2 mg, 59% yield). <sup>1</sup>H NMR (CDCl<sub>3</sub>, 500 MHz): δ 7.96 (d, *J* = 15.0 Hz, 1H), 7.89 (s, 1H), 7.68-7.60 (m, 5H), 7.30 (s, 1H), 7.00 (d, *J* = 8.0 Hz, 2H), 6.93 (d, *J* = 7.5 Hz, 2H), 3.88 (s, 6H), 3.85 (br, 4H), 2.96 (br, 4H), 1.79-1.74 (m, 6H), 1.50 (br, 6H) ppm. <sup>13</sup>C NMR (CDCl<sub>3</sub>, 125 MHz): 160.5, 159.0, 158.8, 155.7, 115.2, 141.3, 137.7, 133.4, 133.2, 129.5, 129.3, 127.8, 119.7, 119.2, 116.9, 114.2, 113.9, 109.3, 81.8, 55.3, 52.0, 49.8, 26.2, 25.6, 24.8, 24.0 ppm. HRMS (ESI) *m/z*: [M+H]<sup>+</sup> calculated for C<sub>36</sub>H<sub>39</sub>N<sub>4</sub>O<sub>2</sub>, 559.3068; found, 559.3062.

**(E)-7-(4-(Dimethylamino)phenyl)-1-(4-(dimethylamino)styryl)-3,6-di(piperidin-1-yl)isoquinoline-4-carbonitrile (FQ-DMA-7).** Following the general procedure, using petroleum ether/ethyl acetate (15:1, v/v) as the eluent to afford an orange solid (316.5 mg, 54% yield). <sup>1</sup>H NMR (CDCl<sub>3</sub>, 500 MHz): δ 7.96 (d, *J* = 15.0 Hz, 1H), 7.91 (s, 1H), 7.63-7.54 (m, 5H), 7.29 (s, 1H), 6.85 (br, 2H), 6.71 (d, *J* = 7.5 Hz, 2H), 3.85 (br, 4H), 3.03 (s, 12H), 2.97 (br, 4H), 1.79-1.73 (m, 6H), 1.52 (br, 6H) ppm. <sup>13</sup>C NMR (CDCl<sub>3</sub>, 125 MHz): 159.3, 155.7, 155.6, 150.8, 149.5, 140.7, 138.3, 133.4, 129.2, 129.0, 127.5, 124.6, 119.5, 117.2, 116.9, 112.4, 111.9, 109.1, 81.3, 51.9, 49.8, 40.58, 40.56, 40.18, 40.16, 26.3, 25.7, 24.8, 24.1 ppm. HRMS (ESI) *m/z*: [M+H]<sup>+</sup> calculated for C<sub>38</sub>H<sub>45</sub>N<sub>6</sub>, 585.3700; found, 585.3695.

## References

1. H. Li, Y. Guo, G. Li, H. Xiao, Y. Lei, X. Huang, J. Chen, H. Wu, J. Ding and Y. Cheng, *J. Phys. Chem. C*, 2015, **119**, 6737–6748.
2. X. Zhang, D. Wang, H. Shen, S. Wang, Y. Zhou, Y. Lei, W. Gao, M. Liu, X. Huang and H. Wu, *Org. Chem. Front.*, 2021, **8**, 856–867.

## 2. Schemes, figures, and tables

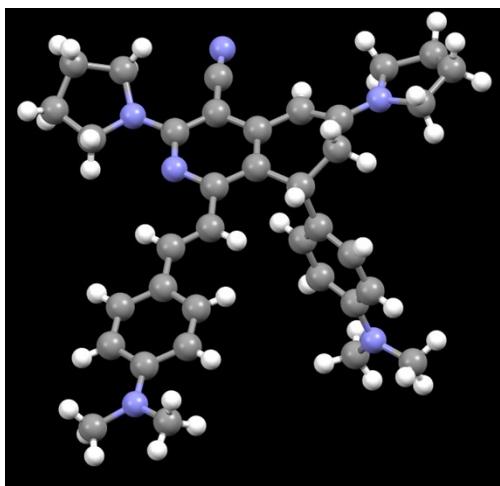

**Fig. S1** Crystal structure of FQ-DMA-2H. Single crystal of FQ-DMA-2H is obtained from a slow diffusion of a petroleum ether/ $\text{CHCl}_3$  mixture (1:2, v:v).

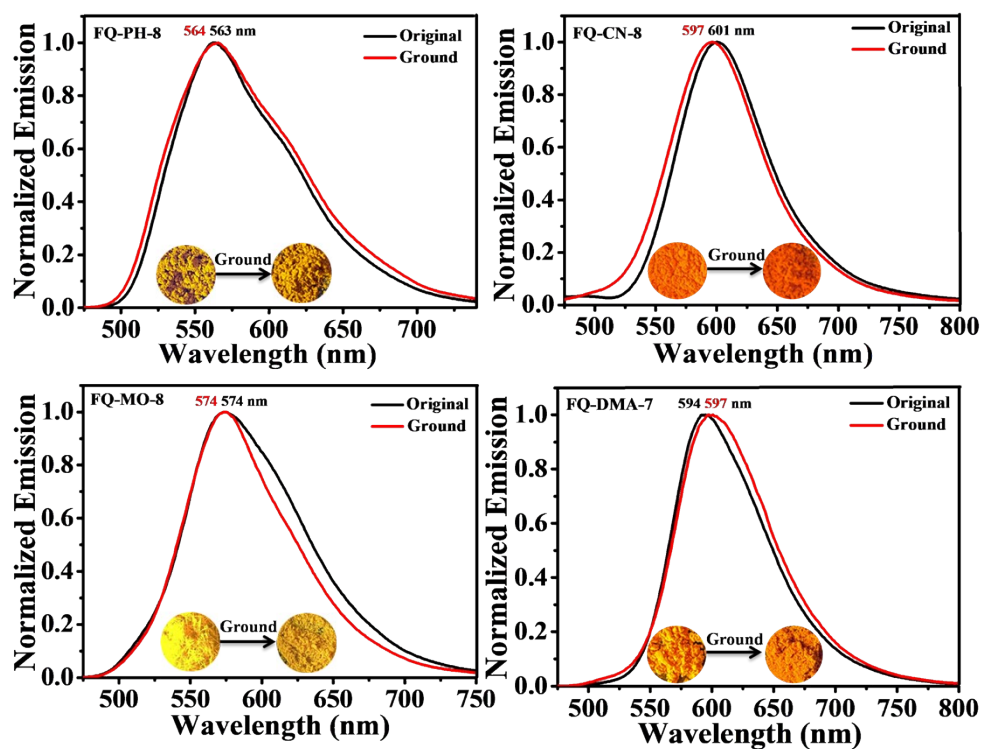

**Fig. S2** Fluorescence spectra of the original samples of pyrrolidin-1-yl-substituted isoquinolines before and after grinding.

**Table S1** Emission wavelengths and quantum efficiencies of the target compounds under different conditions.

| Compound        | Type       | $\lambda_{em}$<br>(nm) | $\Phi_F$<br>(%) |
|-----------------|------------|------------------------|-----------------|
| <b>FQ-PH-8</b>  | Original   | 563                    | 7.3             |
|                 | Ground     | 564                    | 5.4             |
|                 | Acid-fumed | 618                    | 0.5             |
| <b>FQ-CN-8</b>  | Original   | 601                    | 0.7             |
|                 | Ground     | 597                    | 0.5             |
|                 | Acid-fumed | 630                    | 0.2             |
| <b>FQ-MO-8</b>  | Original   | 574                    | 4.7             |
|                 | Ground     | 574                    | 1.3             |
|                 | Acid-fumed | 627                    | 0.3             |
| <b>FQ-DMA-7</b> | Original   | 597                    | 1.5             |
|                 | Ground     | 594                    | 0.6             |
|                 | Acid-fumed | 534                    | 0.2             |
| <b>SQ-PH-8</b>  | Original   | 582                    | 6.1             |
|                 | Ground     | 576                    | 4.0             |
|                 | Acid-fumed | 629                    | 0.6             |
| <b>SQ-CN-8</b>  | Original   | 587                    | 14.1            |
|                 | Ground     | 583                    | 3.5             |
|                 | Acid-fumed | 535                    | 0.05            |
| <b>SQ-MO-7</b>  | Original   | 587                    | 23.2            |
|                 | Ground     | 579                    | 5.4             |
|                 | Acid-fumed | 650                    | 3.3             |
| <b>SQ-DMA-7</b> | Original   | 612                    | 3.7             |
|                 | Ground     | 602                    | 1.3             |
|                 | Acid-fumed | 594                    | 0.4             |

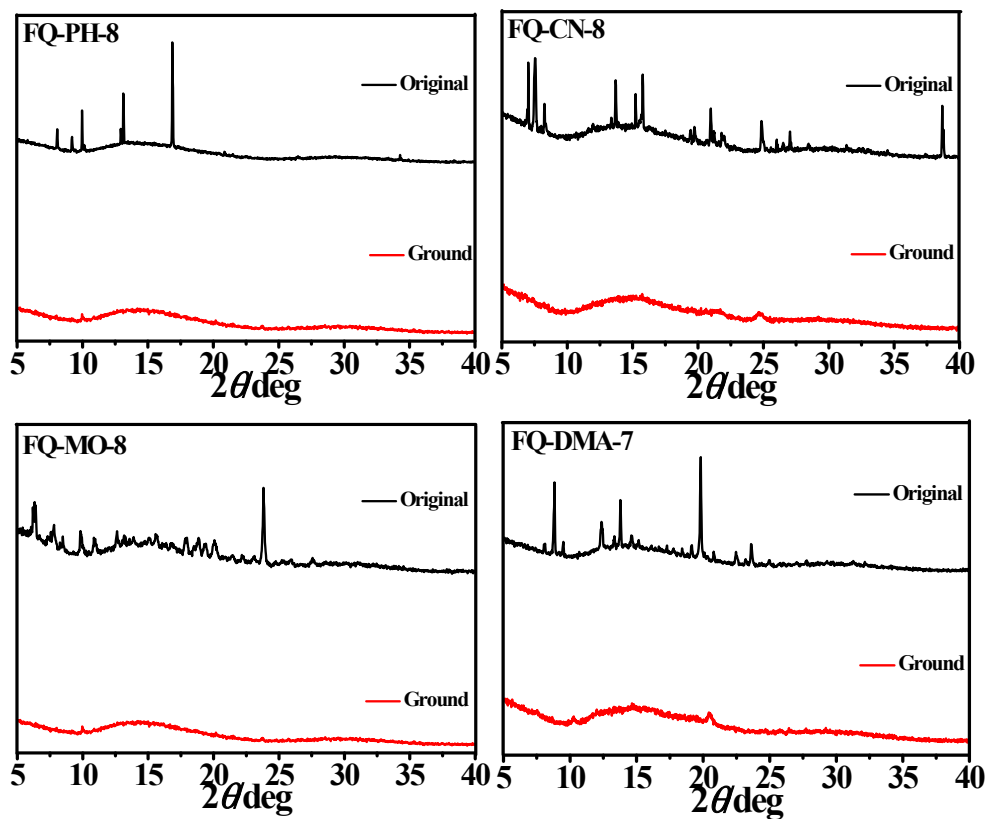

Fig. S3 XRD curves of pyrrolidin-1-yl-substituted isoquinolines before and after grinding.

**Table S2** Crystal data and details of collection and refinement for the pyrrolidin-1-yl-substituted compounds.

|                                                | FQ-DMA-2H                                      | FQ-PH-8                                        | FQ-CN-8                                        | FQ-MO-8                                                       | FQ-MO-7                                                       | FQ-DMA-7                                       |
|------------------------------------------------|------------------------------------------------|------------------------------------------------|------------------------------------------------|---------------------------------------------------------------|---------------------------------------------------------------|------------------------------------------------|
| CCDC (no.)                                     | 2161234                                        | 2161235                                        | 2161236                                        | 2161238                                                       | 2161237                                                       | 2161239                                        |
| Empirical formula                              | C <sub>36</sub> H <sub>42</sub> N <sub>6</sub> | C <sub>32</sub> H <sub>30</sub> N <sub>4</sub> | C <sub>34</sub> H <sub>28</sub> N <sub>6</sub> | C <sub>34</sub> H <sub>34</sub> N <sub>4</sub> O <sub>2</sub> | C <sub>34</sub> H <sub>34</sub> N <sub>4</sub> O <sub>2</sub> | C <sub>36</sub> H <sub>40</sub> N <sub>6</sub> |
| Formula weight                                 | 558.75                                         | 470.60                                         | 520.62                                         | 530.65                                                        | 530.65                                                        | 556.74                                         |
| Temperature (K)                                | 293.01                                         | 293(2)                                         | 293(2)                                         | 293(2)                                                        | 213(2)                                                        | 293(2)                                         |
| Crystal system                                 | Monoclinic                                     | Monoclinic                                     | Triclinic                                      | Triclinic                                                     | Triclinic                                                     | Monoclinic                                     |
| Space group                                    | <i>P</i> 1 2(1)/n1                             | <i>P</i> 2(1)/n                                | <i>P</i> $\bar{1}$                             | <i>P</i> $\bar{1}$                                            | <i>P</i> $\bar{1}$                                            | <i>P</i> 2(1)/c                                |
| <i>Z</i>                                       | 4                                              | 4                                              | 4                                              | 2                                                             | 2                                                             | 4                                              |
| <i>D</i> <sub>calcd</sub> [Mg/m <sup>3</sup> ] | 1.059                                          | 1.211                                          | 1.279                                          | 1.264                                                         | 1.231                                                         | 1.086                                          |
| <i>F</i> (000)                                 | 1200                                           | 1000                                           | 1096                                           | 564                                                           | 564                                                           | 1192                                           |
| $\theta$ range [°]                             | 2.423-25.499                                   | 2.074-24.994                                   | 2.079-26.000                                   | 2.294-25.499                                                  | 2.432-25.499                                                  | 2.459-24.999                                   |
| <i>R</i> <sub>1</sub> [I>2 $\sigma$ (I)]       | 0.0673                                         | 0.0808                                         | 0.0552                                         | 0.0511                                                        | 0.0521                                                        | 0.0914                                         |
| <i>wR</i> <sub>2</sub> [I>2 $\sigma$ (I)]      | 0.1733                                         | 0.1833                                         | 0.1274                                         | 0.1101                                                        | 0.1119                                                        | 0.2639                                         |
| <i>a</i> [Å]                                   | 13.3509(10)                                    | 6.3523(18)                                     | 8.6436(4)                                      | 9.4015(4)                                                     | 8.4322(15)                                                    | 17.1607(13)                                    |
| <i>b</i> [Å]                                   | 10.8299(8)                                     | 19.643(6)                                      | 13.9559(6)                                     | 11.3355(5)                                                    | 12.189(2)                                                     | 8.3021(7)                                      |
| <i>c</i> [Å]                                   | 24.274(2)                                      | 20.707(8)                                      | 23.8230(10)                                    | 13.9846(5)                                                    | 14.487(3)                                                     | 24.754(2)                                      |
| $\alpha$ [deg]                                 | 90                                             | 90                                             | 100.8030(10)                                   | 82.1270(10)                                                   | 104.542(6)                                                    | 90                                             |
| $\beta$ [deg]                                  | 93.508(2)                                      | 92.809(10)                                     | 93.3960(10)                                    | 70.8020(10)                                                   | 96.455(7)                                                     | 105.113(2)                                     |
| $\gamma$ [deg]                                 | 90                                             | 90                                             | 105.4040(10)                                   | 87.3020(10)                                                   | 90.161(6)                                                     | 90                                             |
| <i>V</i> [Å <sup>3</sup> ]                     | 3503.2(5)                                      | 2580.7(14)                                     | 2703.3(2)                                      | 1394.20(10)                                                   | 1431.4(5)                                                     | 3404.8(5)                                      |



|                          |        |        |        |        |        |        |
|--------------------------|--------|--------|--------|--------|--------|--------|
| GOF                      | 1.063  | 1.034  | 1.004  | 1.036  | 1.048  | 0.926  |
| $R(\text{int})$          | 0.0940 | 0.0912 | 0.0570 | 0.0507 | 0.0400 | 0.0608 |
| No. of reflens collected | 35897  | 11437  | 54303  | 33329  | 17362  | 27781  |
| No. of unique reflens    | 6505   | 4529   | 10617  | 5181   | 5309   | 5977   |
| $R_1$ (all data)         | 0.1394 | 0.1867 | 0.0999 | 0.0810 | 0.0827 | 0.1994 |
| $wR_2$ (all data)        | 0.2212 | 0.2429 | 0.1576 | 0.1287 | 0.1318 | 0.3211 |

**Table S3** Crystal data and details of collection and refinement for the piperidin-1-yl-substituted compounds.

|                                         | <b>SQ-PH-8</b>                                 | <b>SQ-CN-8</b>                                 | <b>SQ-MO-7</b>                                                | <b>SQ-DMA-7</b>                                |
|-----------------------------------------|------------------------------------------------|------------------------------------------------|---------------------------------------------------------------|------------------------------------------------|
| CCDC (no.)                              | 2161240                                        | 2161241                                        | 2161242                                                       | 2161243                                        |
| Empirical formula                       | C <sub>34</sub> H <sub>34</sub> N <sub>4</sub> | C <sub>36</sub> H <sub>32</sub> N <sub>6</sub> | C <sub>36</sub> H <sub>38</sub> N <sub>4</sub> O <sub>2</sub> | C <sub>38</sub> H <sub>44</sub> N <sub>6</sub> |
| Formula weight                          | 498.65                                         | 548.67                                         | 558.70                                                        | 584.79                                         |
| Temperature (K)                         | 293(2)                                         | 293(2)                                         | 293.15                                                        | 293(2)                                         |
| Crystal system                          | Triclinic                                      | Triclinic                                      | Triclinic                                                     | Triclinic                                      |
| Space group                             | $P\bar{1}$                                     | $P\bar{1}$                                     | $P\bar{1}$                                                    | $P\bar{1}$                                     |
| $Z$                                     | 2                                              | 2                                              | 2                                                             | 2                                              |
| $D_{\text{calcd}}$ [Mg/m <sup>3</sup> ] | 1.198                                          | 1.229                                          | 1.117                                                         | 1.159                                          |
| $F(000)$                                | 532                                            | 580                                            | 596                                                           | 628                                            |
| $\theta$ range [°]                      | 2.533-25.499                                   | 2.632-25.500                                   | 2.458-25.499                                                  | 2.129-24.999                                   |
| $R_1$ [ $I > 2\sigma(I)$ ]              | 0.0499                                         | 0.0657                                         | 0.0679                                                        | 0.0734                                         |
| $wR_2$ [ $I > 2\sigma(I)$ ]             | 0.1210                                         | 0.1427                                         | 0.1751                                                        | 0.1441                                         |
| $a$ [Å]                                 | 10.1544(7)                                     | 8.7218(11)                                     | 10.0144(19)                                                   | 11.5660(18)                                    |
| $b$ [Å]                                 | 11.9375(9)                                     | 12.9533(15)                                    | 13.195(3)                                                     | 11.9295(19)                                    |
| $c$ [Å]                                 | 13.0772(10)                                    | 14.4264(17)                                    | 13.519(3)                                                     | 13.2606(19)                                    |
| $\alpha$ [deg]                          | 71.511(2)                                      | 69.115(3)                                      | 109.990(6)                                                    | 71.789(5)                                      |
| $\beta$ [deg]                           | 70.377(2)                                      | 79.040(3)                                      | 92.980(6)                                                     | 75.051(4)                                      |
| $\gamma$ [deg]                          | 72.567(2)                                      | 79.308(3)                                      | 96.345(6)                                                     | 88.530(5)                                      |
| $V$ [Å <sup>3</sup> ]                   | 1382.59(18)                                    | 1482.6(3)                                      | 1660.7(6)                                                     | 1676.2(4)                                      |
| GOF                                     | 1.031                                          | 1.048                                          | 1.098                                                         | 1.013                                          |
| $R(\text{int})$                         | 0.0396                                         | 0.0845                                         | 0.0701                                                        | 0.1173                                         |
| No. of reflens collected                | 33681                                          | 34528                                          | 31358                                                         | 30313                                          |
| No. of unique reflens                   | 5117                                           | 5518                                           | 6166                                                          | 5900                                           |
| $R_1$ (all data)                        | 0.0686                                         | 0.1443                                         | 0.1191                                                        | 0.1972                                         |
| $wR_2$ (all data)                       | 0.1376                                         | 0.1850                                         | 0.2100                                                        | 0.2044                                         |

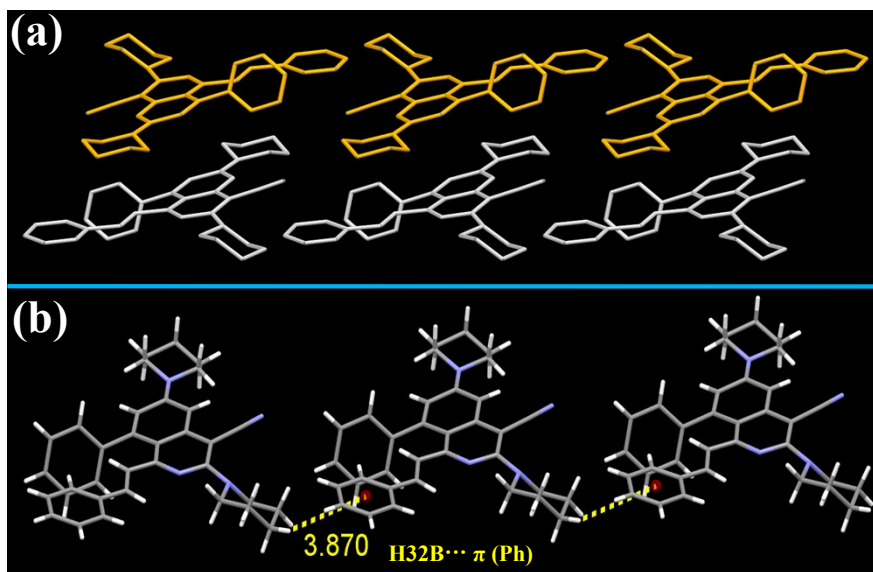

Fig. S4 Stacking arrangements (a) and intramolecular interactions (b) of single crystal SQ-PH-8.

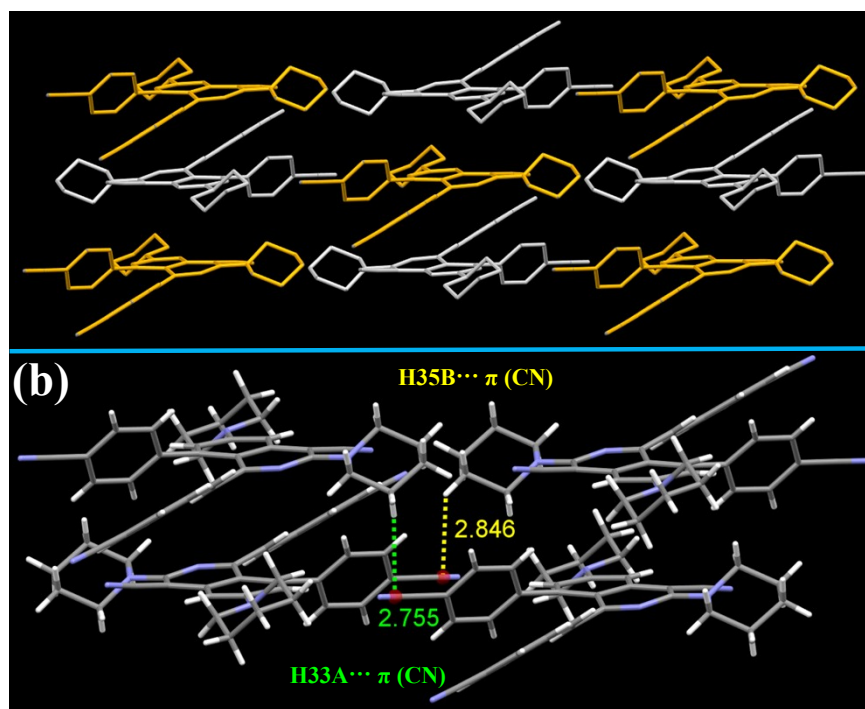

Fig. S5 Stacking arrangements (a) and intramolecular interactions (b) of single crystal SQ-CN-8.

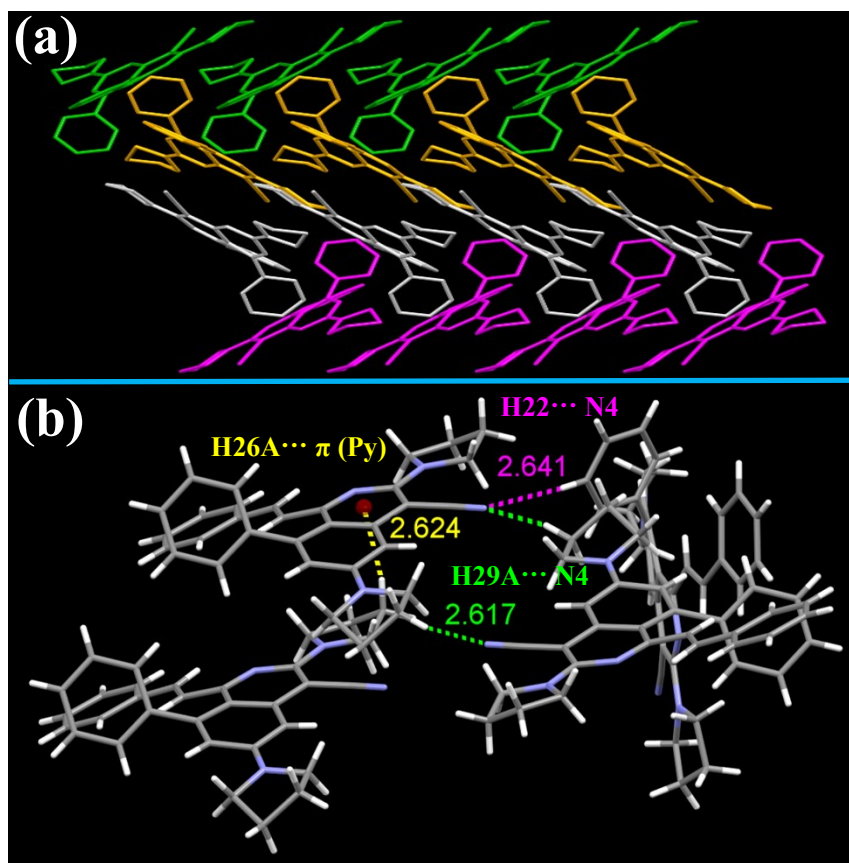

Fig. S6 Stacking arrangements (a) and intramolecular interactions (b) of single crystal FQ-PH-8.

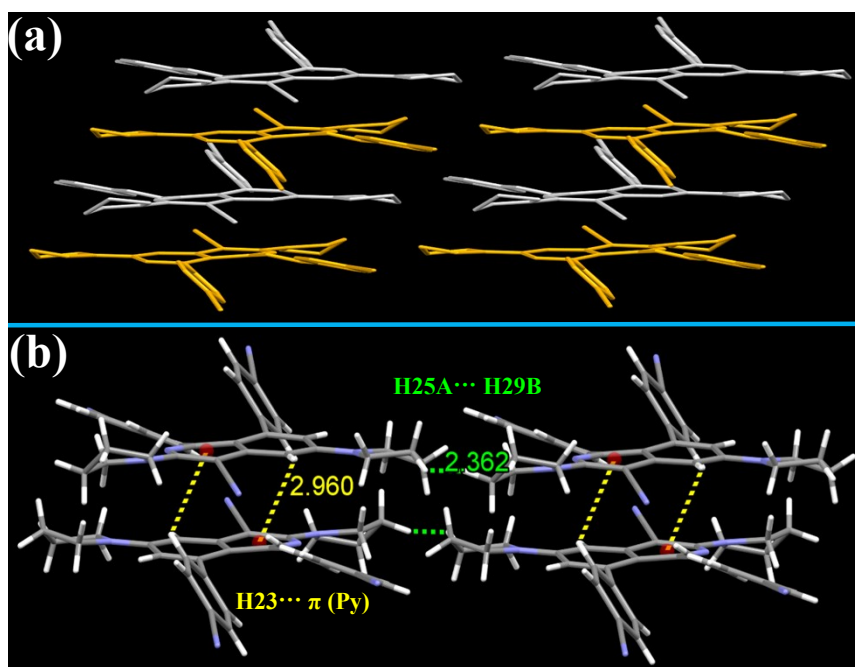

Fig. S7 Stacking arrangements (a) and intramolecular interactions (b) of single crystal FQ-CN-8.

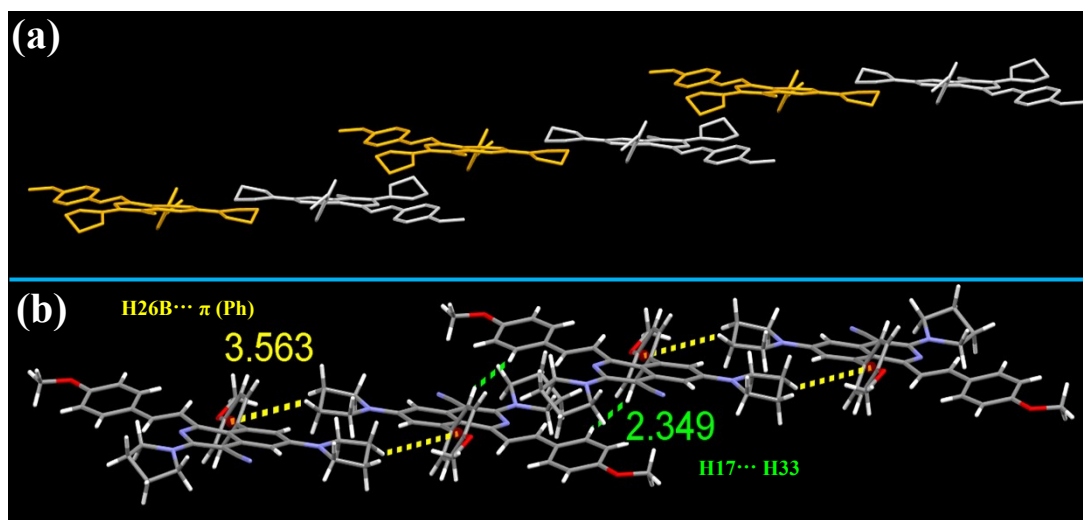

**Fig. S8** Stacking arrangements (a) and intramolecular interactions (b) of single crystal FQ-MO-8.

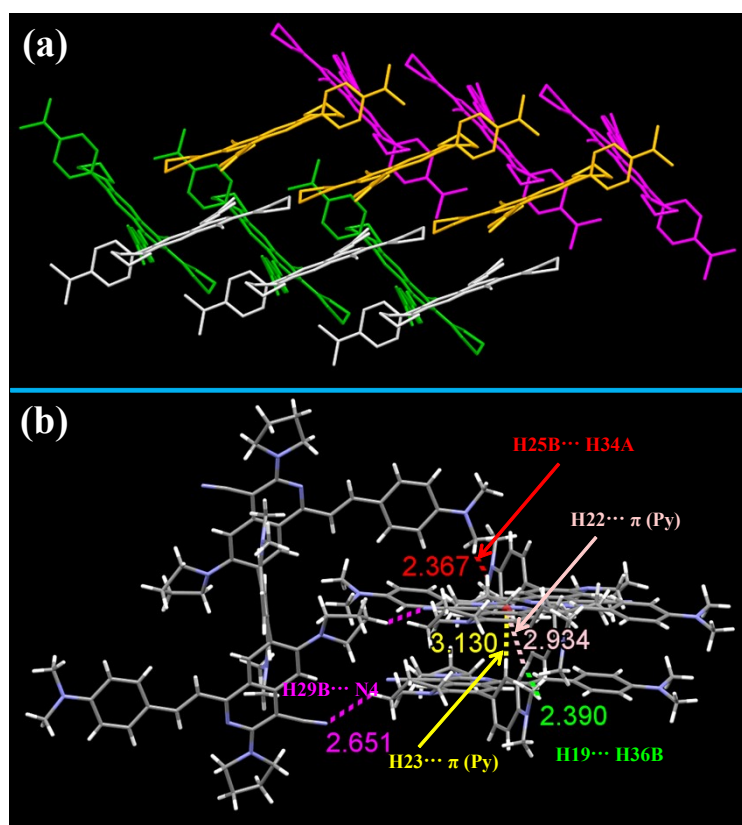

**Fig. S9** Stacking arrangements (a) and intramolecular interactions (b) of single crystal FQ-DMA-7.

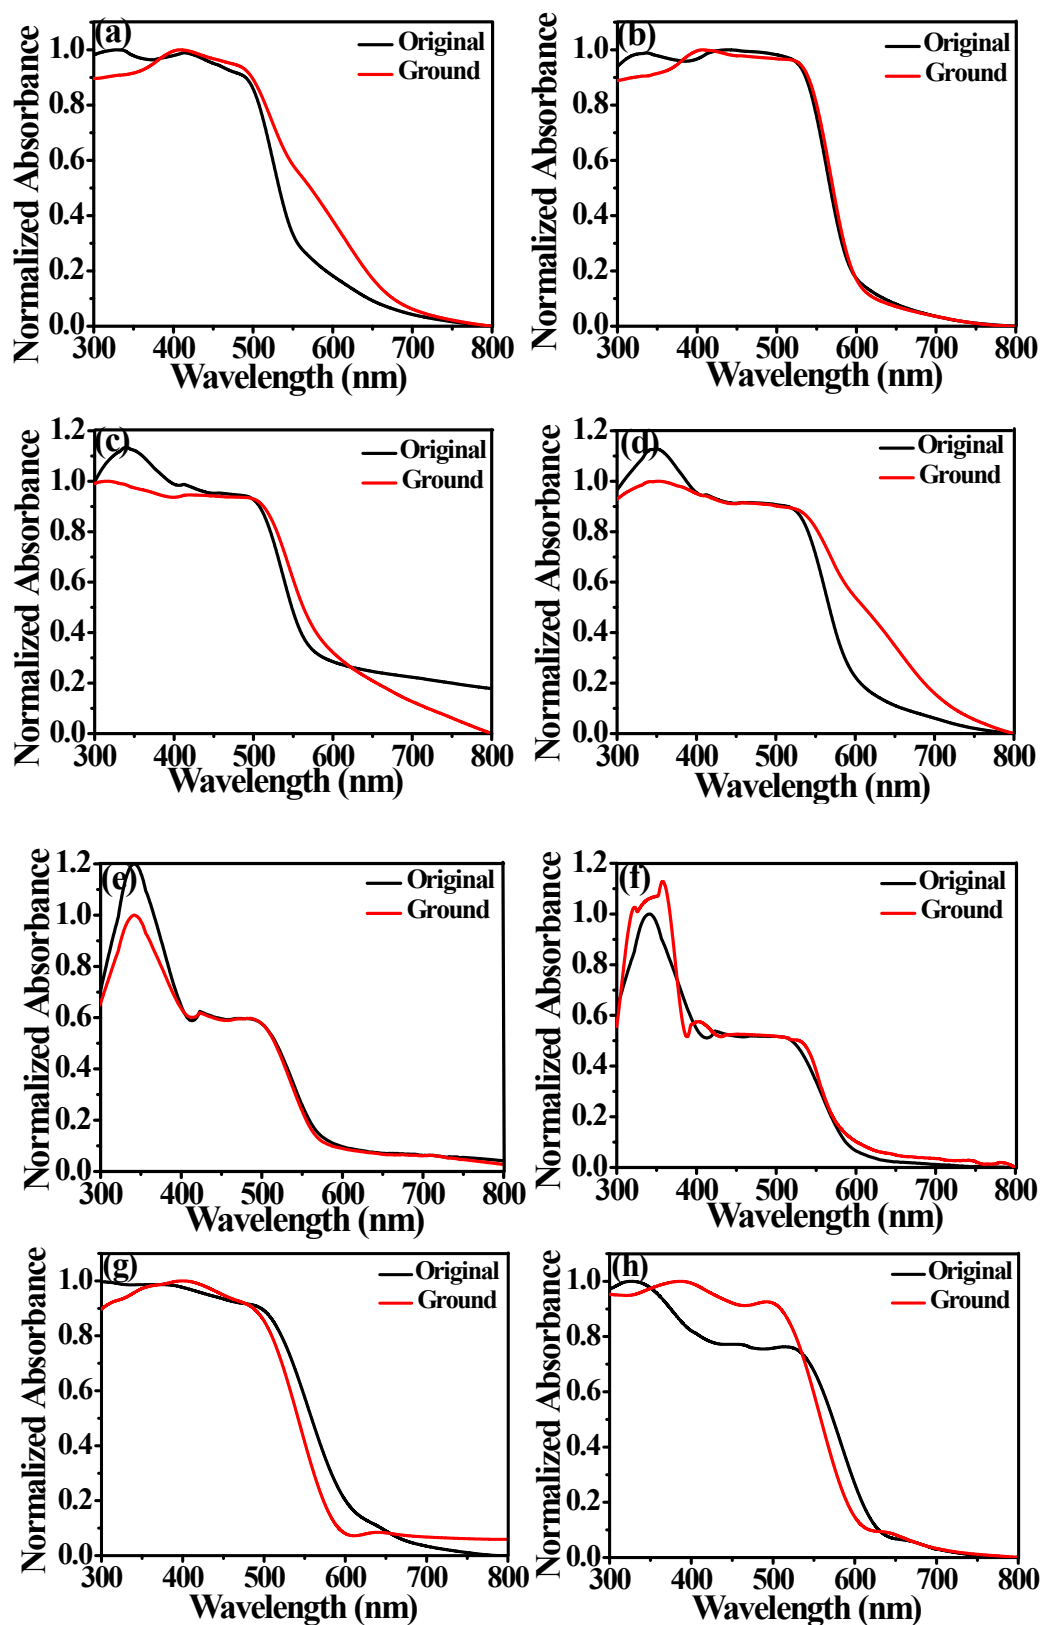

Fig. S10 Solid-state absorption spectra of the original samples of FQ-PH-8 (a), FQ-CN-8 (b), FQ-MO-8 (c), FQ-DMA-7 (d), SQ-PH-8 (e), SQ-CN-8 (f), SQ-MO-7 (g), and SQ-DMA-7 (h) before and after grinding.

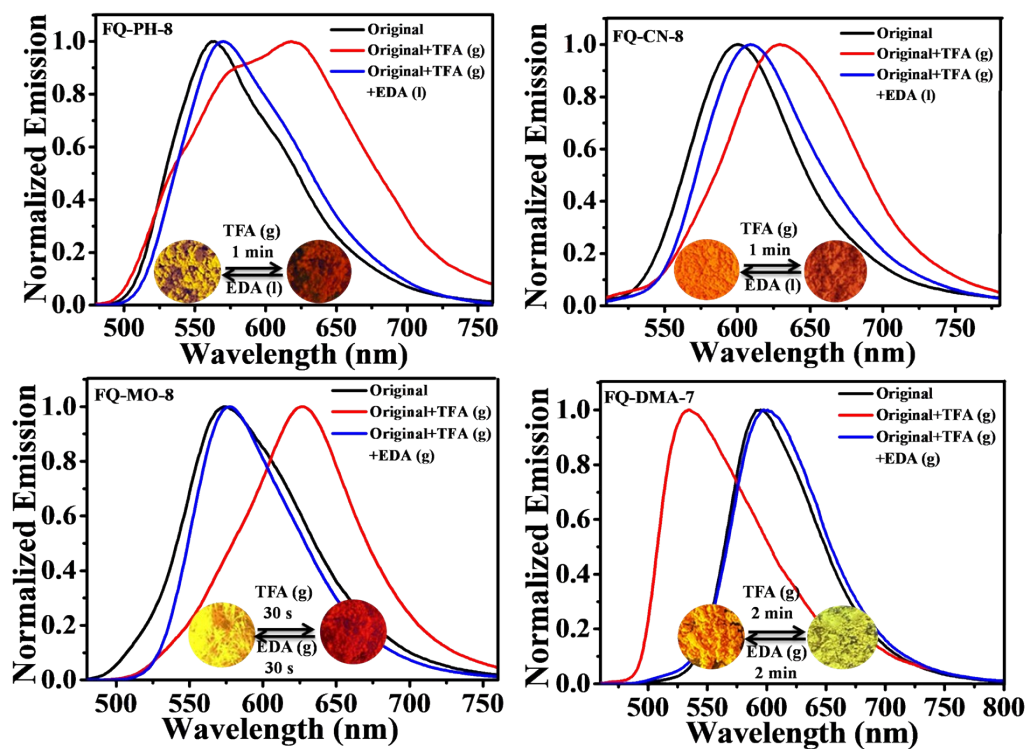

Fig. S11 Emission spectra of the original samples of pyrrolidin-1-yl-substituted isoquinolines upon TFA (g) and then EDA (l)/(g). Inset: fluorescence color pictures under different conditions.

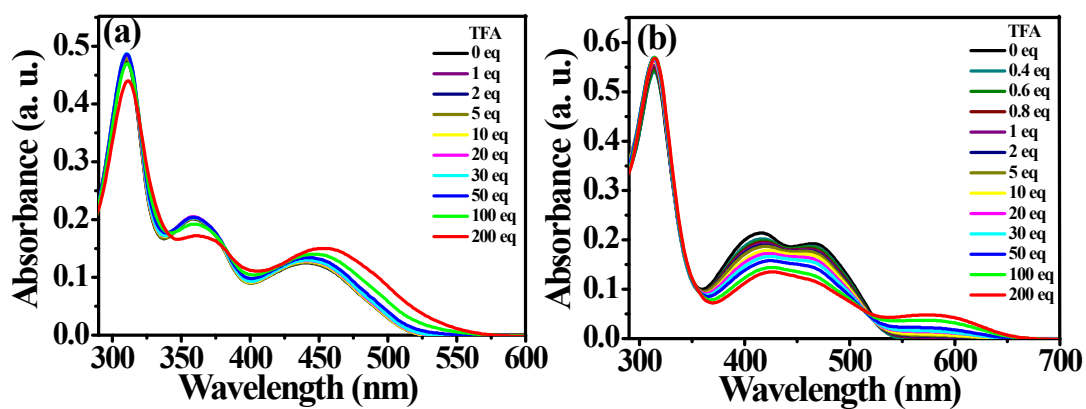

Fig. S12 Absorption spectra of SQ-MO-7 (a) and SQ-DMA-7 (b) in  $\text{CHCl}_3$  solvent at  $1 \times 10^{-5}$  mol/L with the gradual addition of TFA.

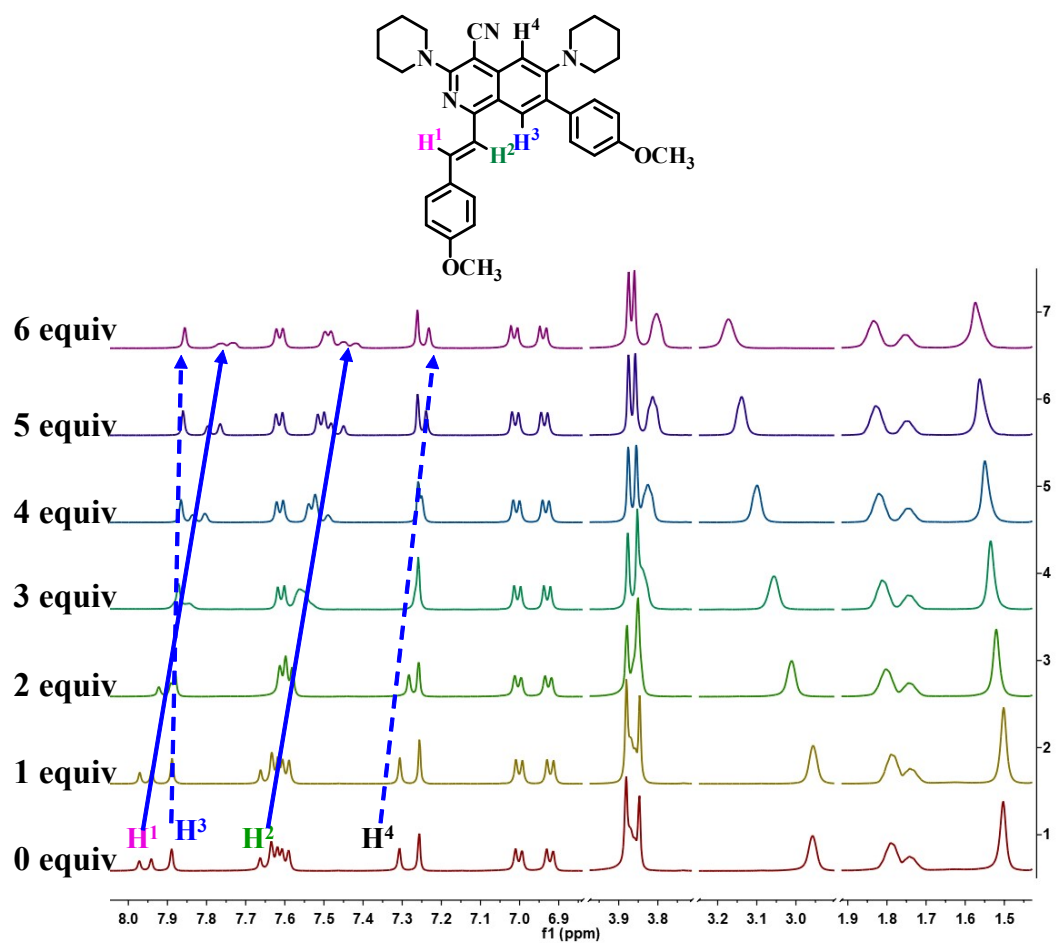

**Fig. S13** Titration experiment of  $^1\text{H}$  NMR spectra of **SQ-MO-7** in  $\text{CDCl}_3$  with the gradual addition of TFA.



## 4. NMR spectra

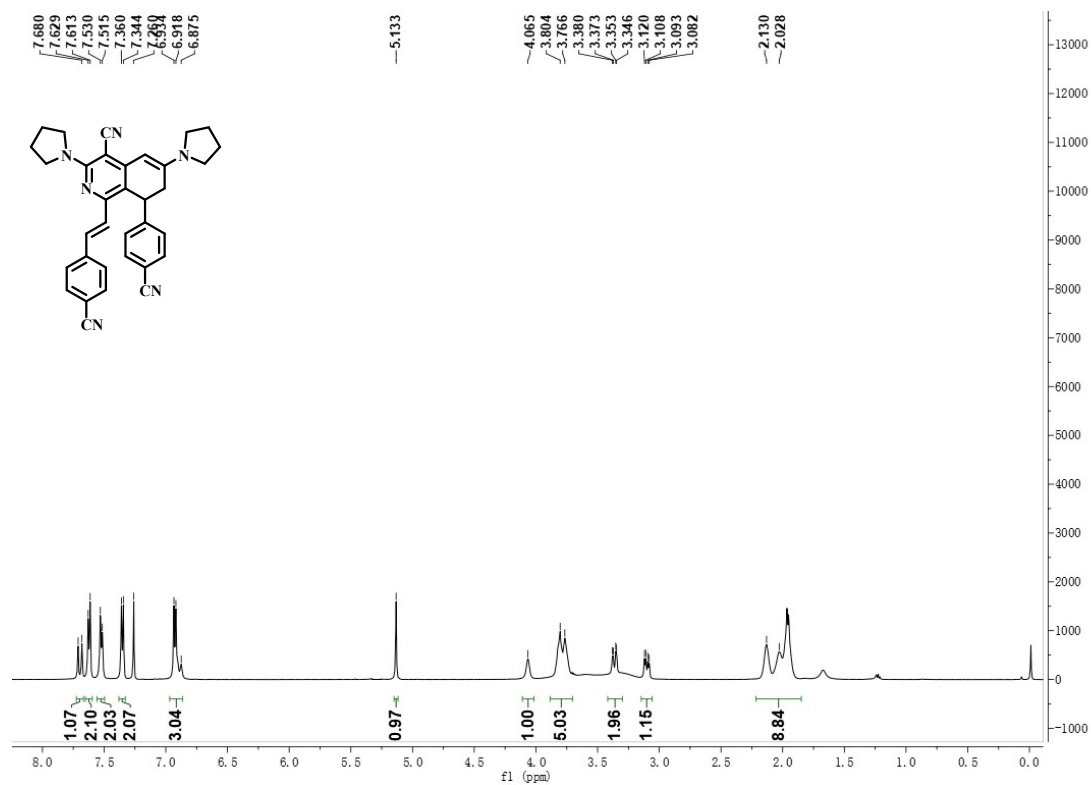

Fig. S14 <sup>1</sup>H NMR of FQ-CN-2H (CDCl<sub>3</sub>, 500 MHz).

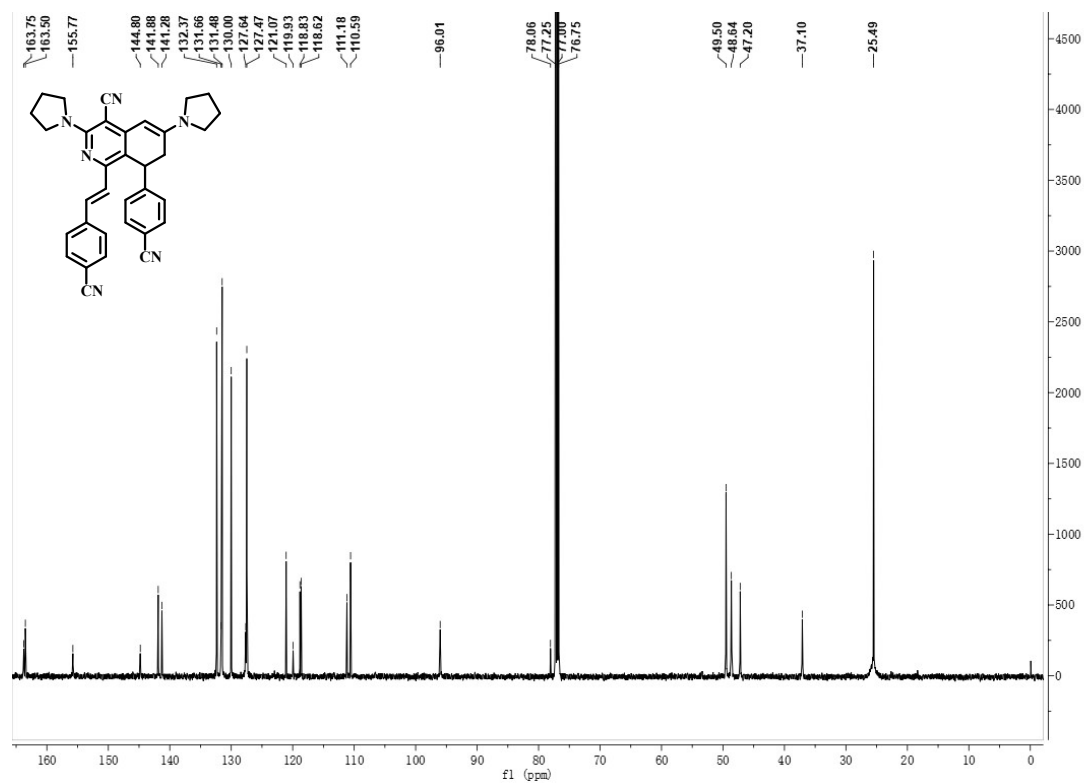

Fig. S15 <sup>13</sup>C NMR of FQ-CN-2H (CDCl<sub>3</sub>, 125 MHz).



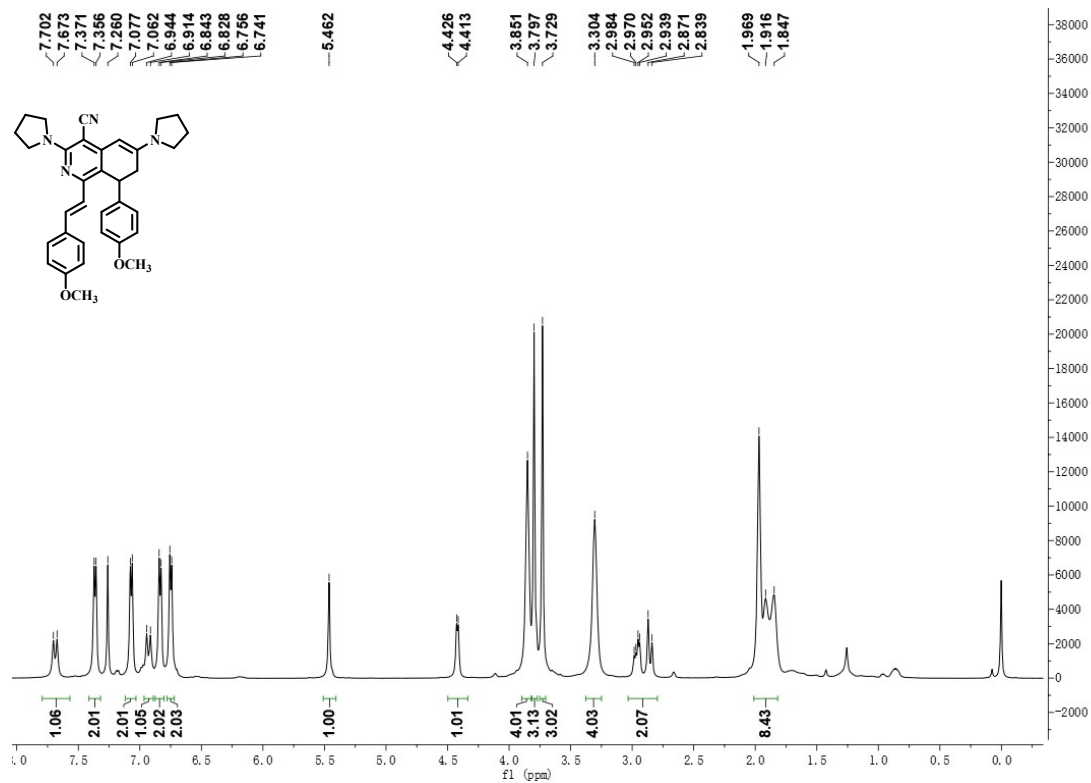

Fig. S16 <sup>1</sup>H NMR of FQ-MO-2H (CDCl<sub>3</sub>, 500 MHz).

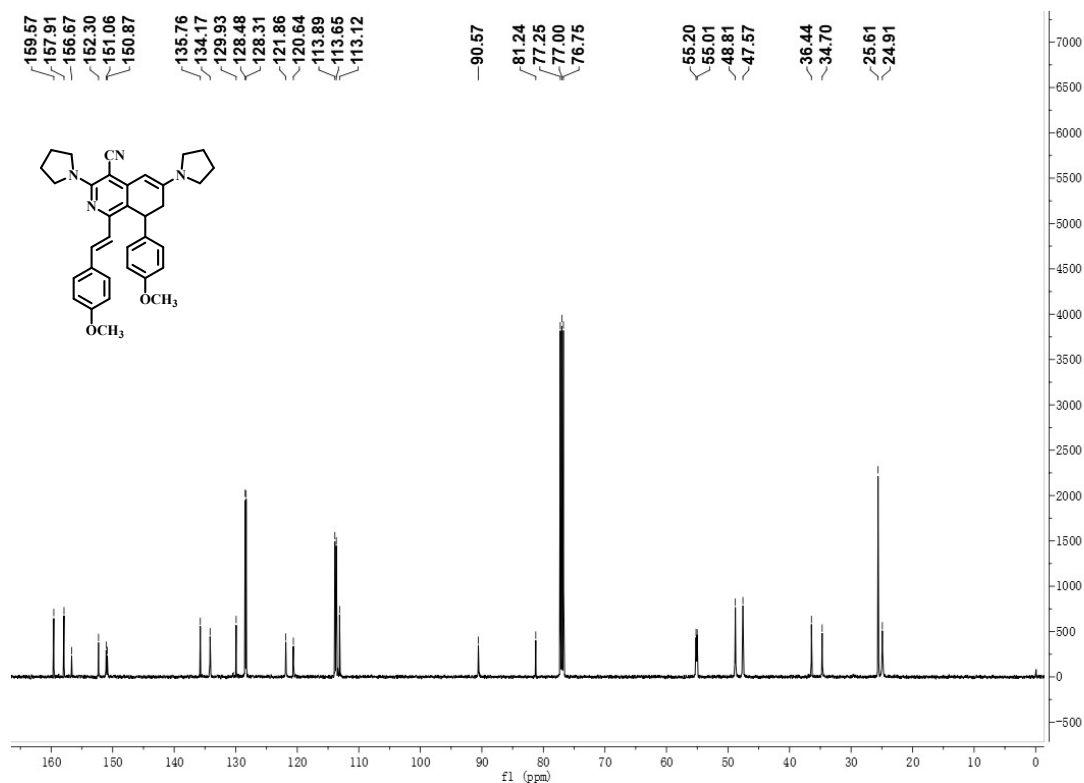

Fig. S17 <sup>13</sup>C NMR of FQ-MO-2H (CDCl<sub>3</sub>, 125 MHz).

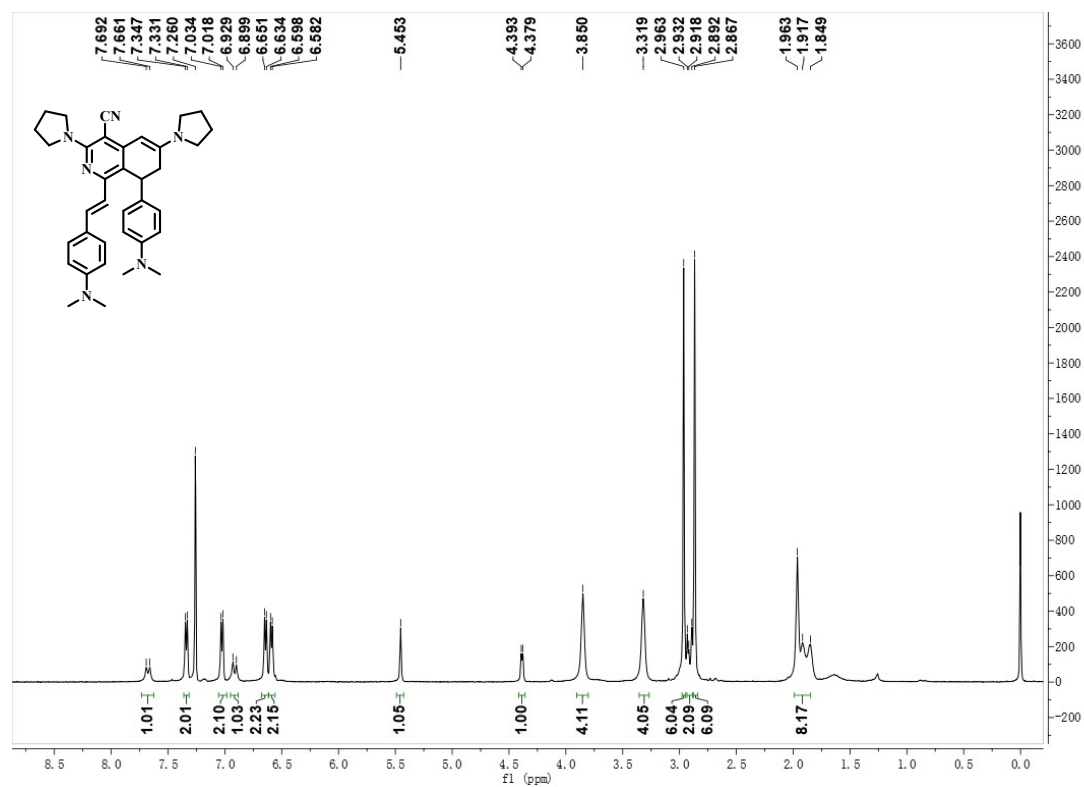

Fig. S18  $^1\text{H}$  NMR of FQ-DMA-2H ( $\text{CDCl}_3$ , 500 MHz).

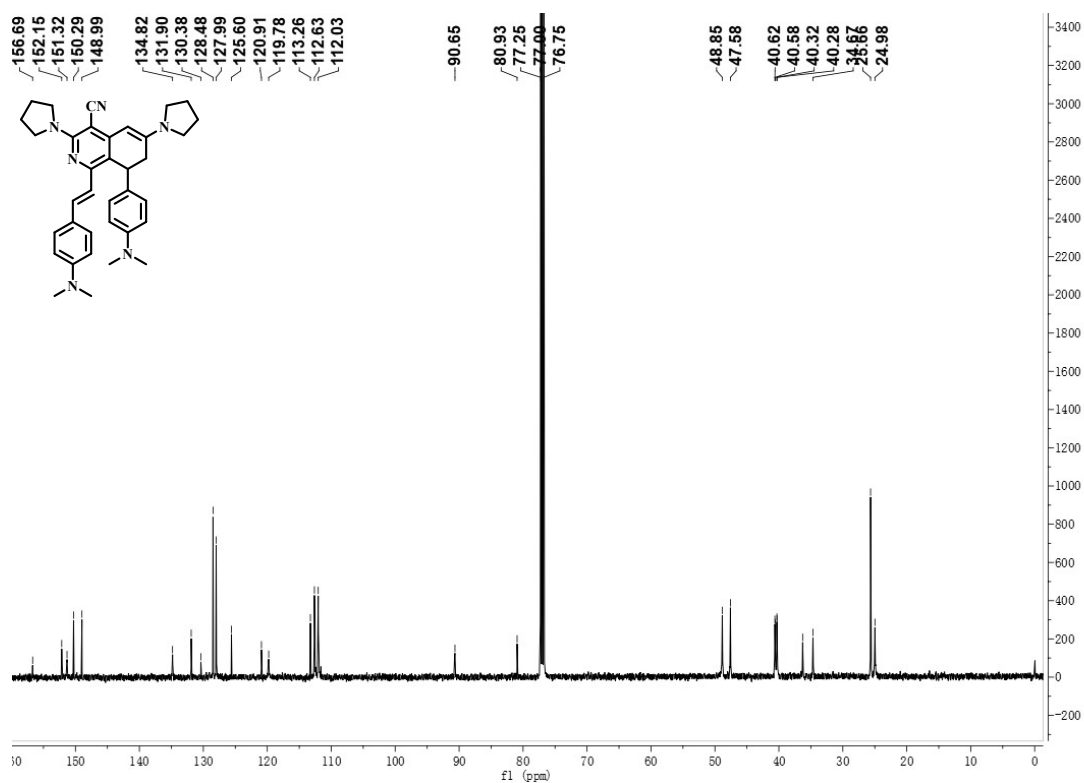

Fig. S19  $^{13}\text{C}$  NMR of FQ-DMA-2H ( $\text{CDCl}_3$ , 125 MHz).

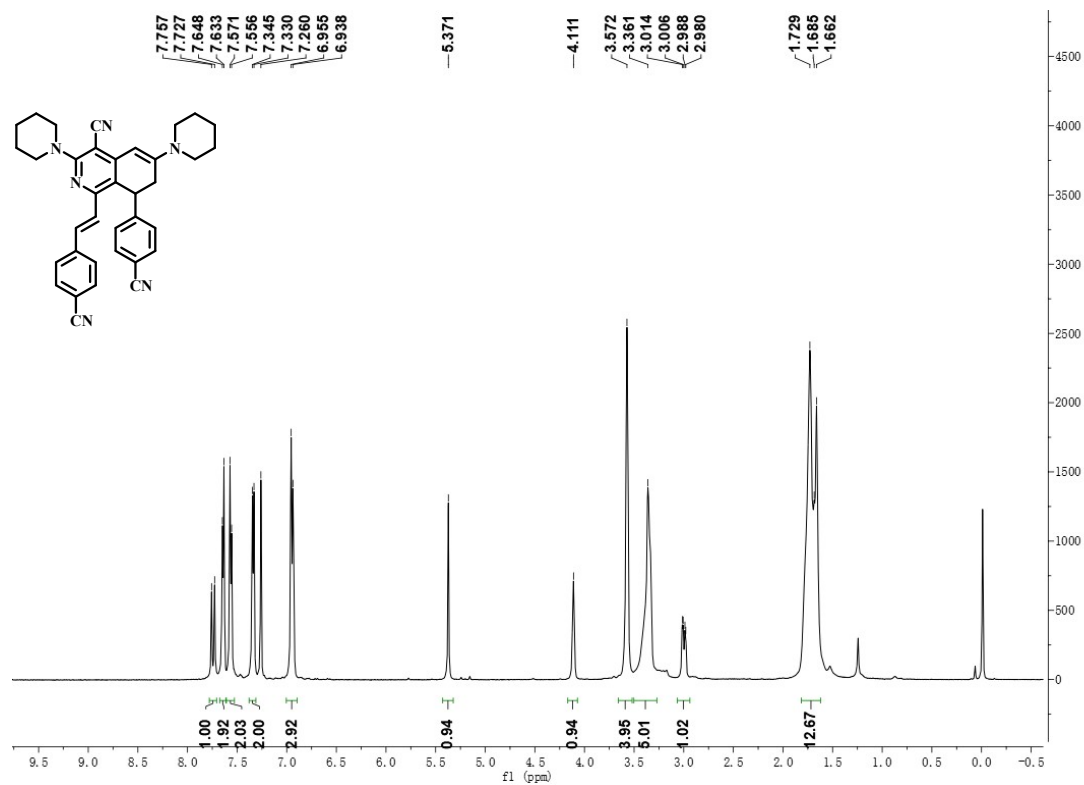

Fig. S20  $^1\text{H}$  NMR of SQ-CN-2H ( $\text{CDCl}_3$ , 500 MHz).

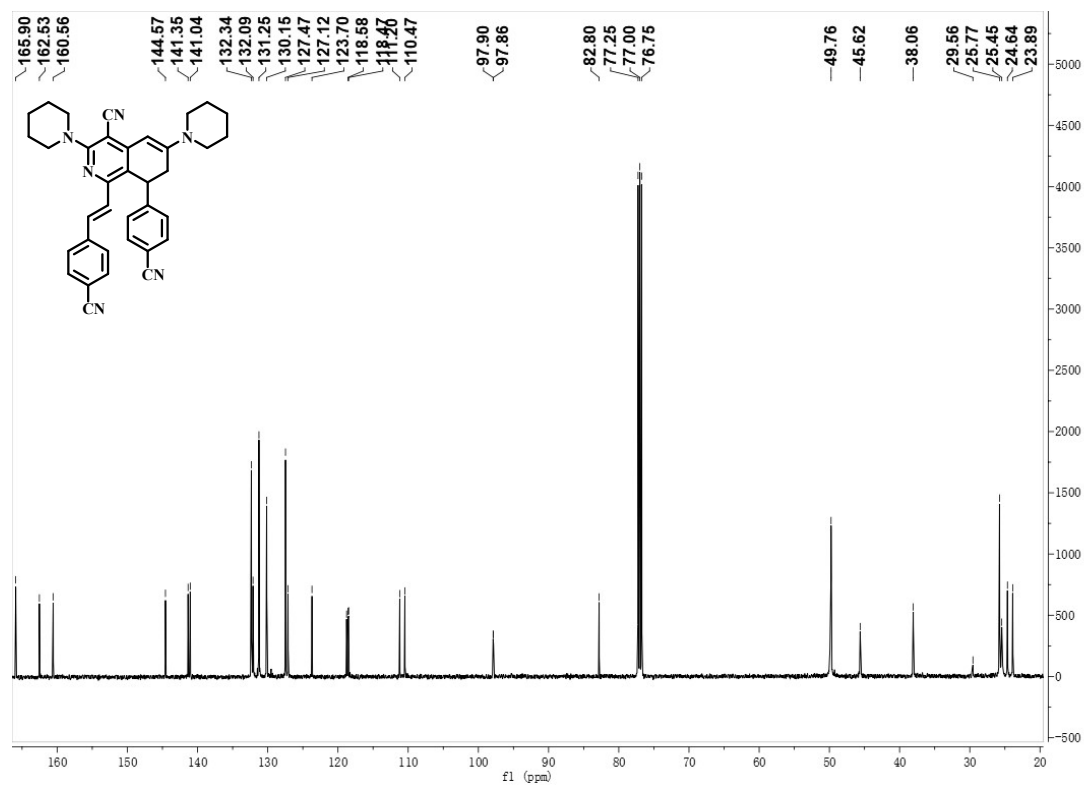

Fig. S21  $^{13}\text{C}$  NMR of SQ-CN-2H ( $\text{CDCl}_3$ , 125 MHz).

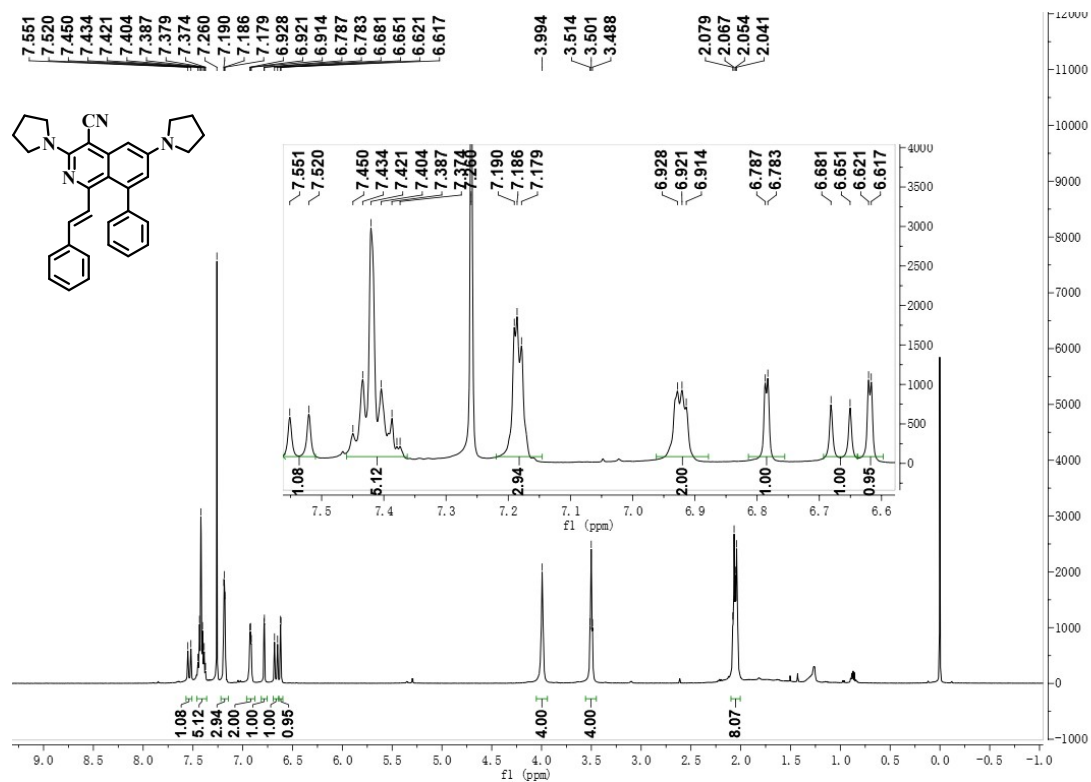

**Fig. S22** <sup>1</sup>H NMR of FQ-PH-8 (CDCl<sub>3</sub>, 500 MHz).

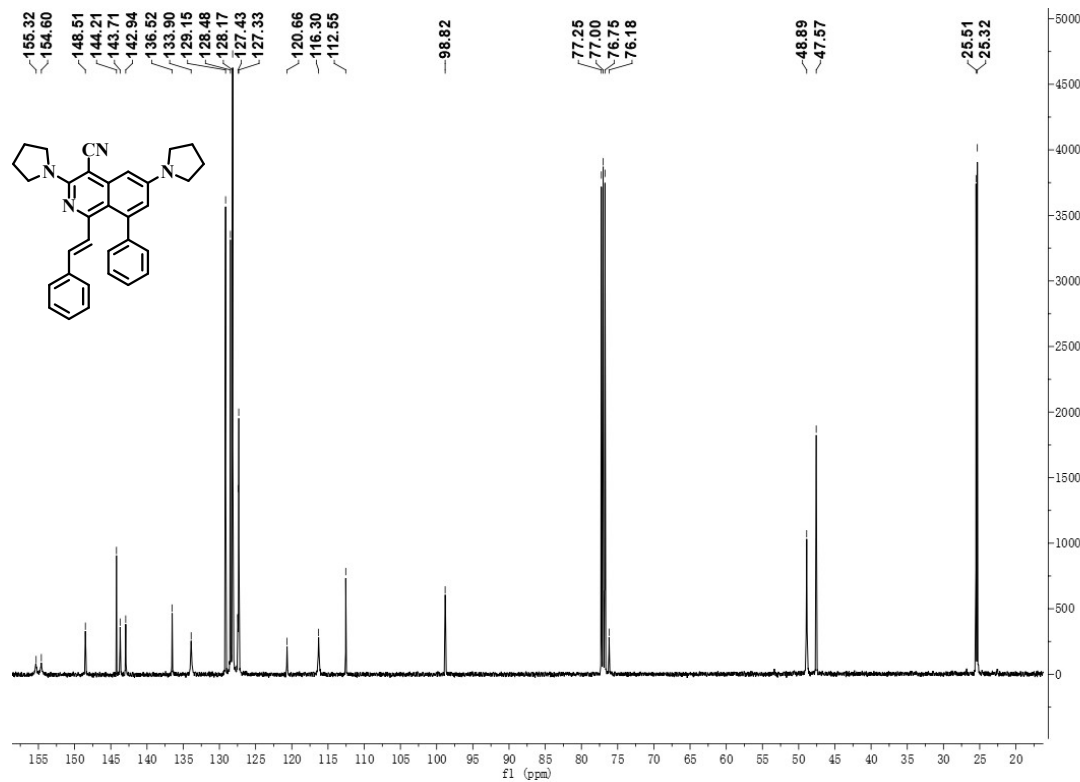

**Fig. S23** <sup>13</sup>C NMR of FQ-PH-8 (CDCl<sub>3</sub>, 125 MHz).

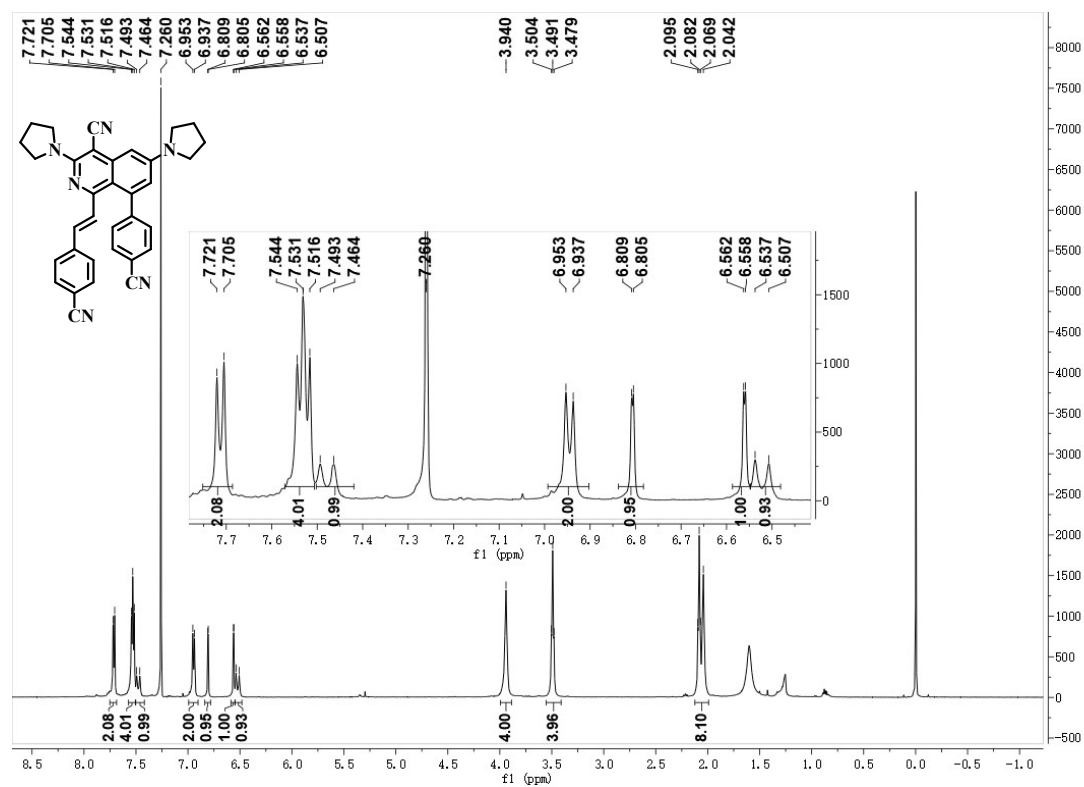

Fig. S24  $^1\text{H}$  NMR of FQ-CN-8 ( $\text{CDCl}_3$ , 500 MHz).

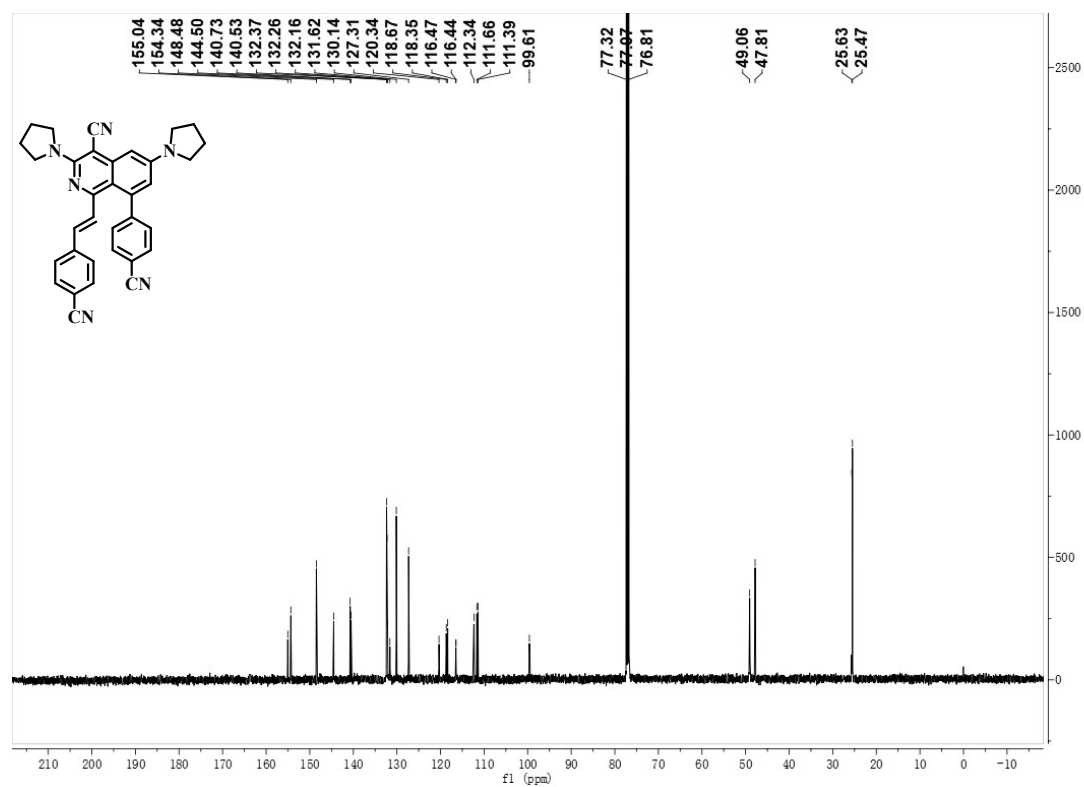

Fig. S25  $^{13}\text{C}$  NMR of FQ-CN-8 ( $\text{CDCl}_3$ , 125 MHz).

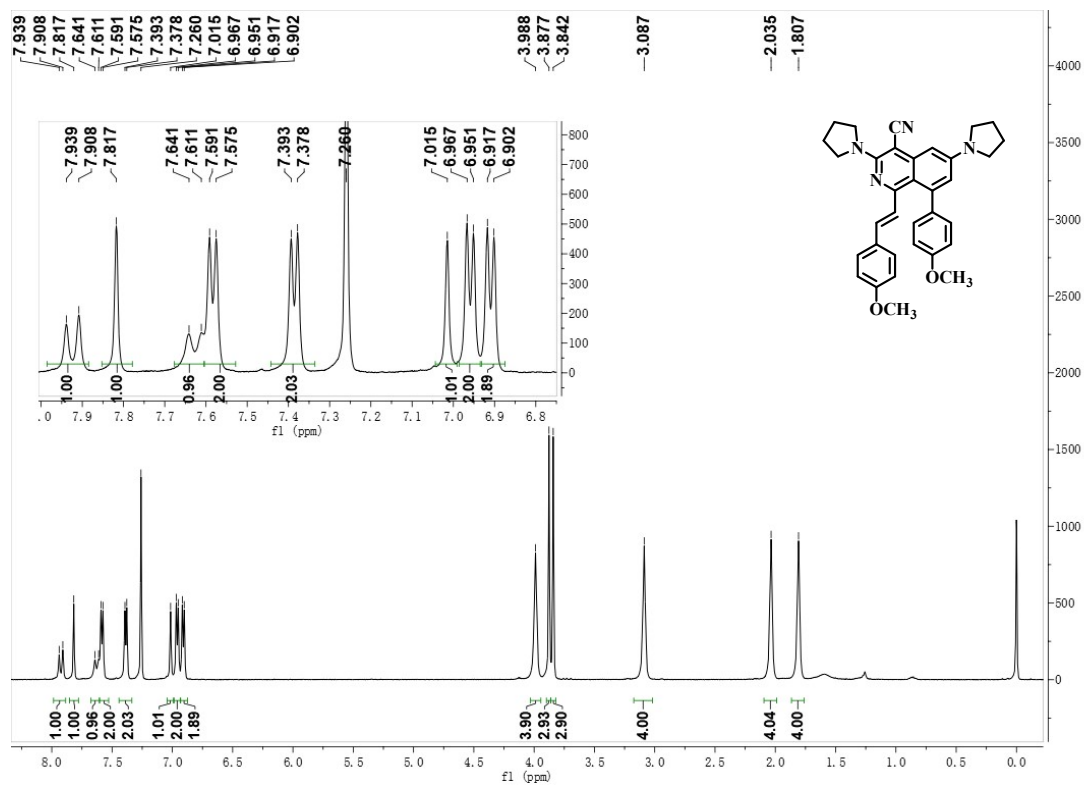

Fig. S26  $^1\text{H}$  NMR of FQ-MO-8 ( $\text{CDCl}_3$ , 500 MHz).

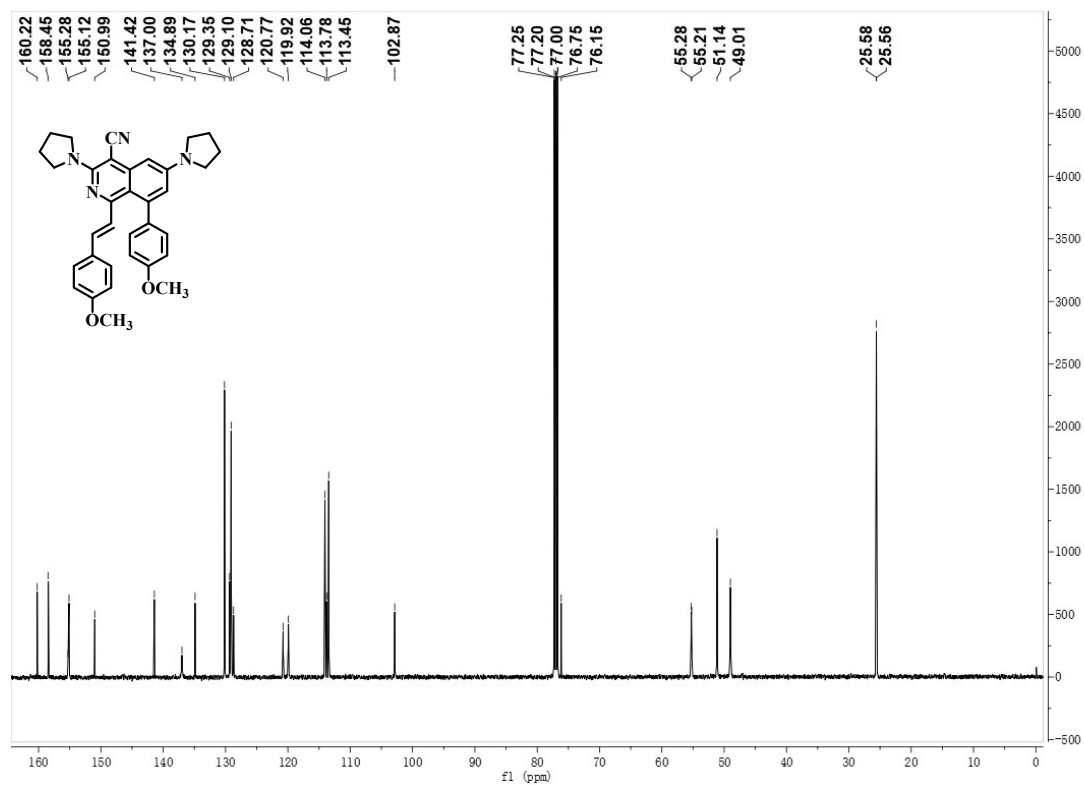

Fig. S27  $^{13}\text{C}$  NMR of FQ-MO-8 ( $\text{CDCl}_3$ , 125 MHz).

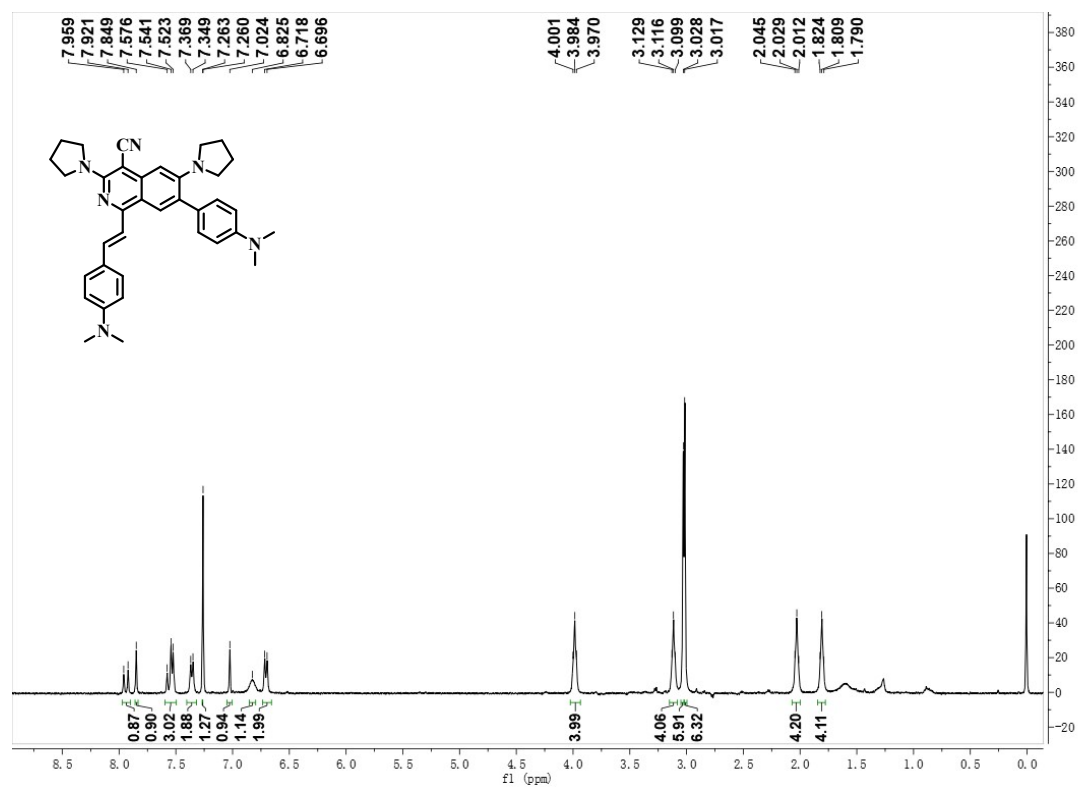

Fig. S28  $^1\text{H}$  NMR of FQ-DMA-7 ( $\text{CDCl}_3$ , 400 MHz).

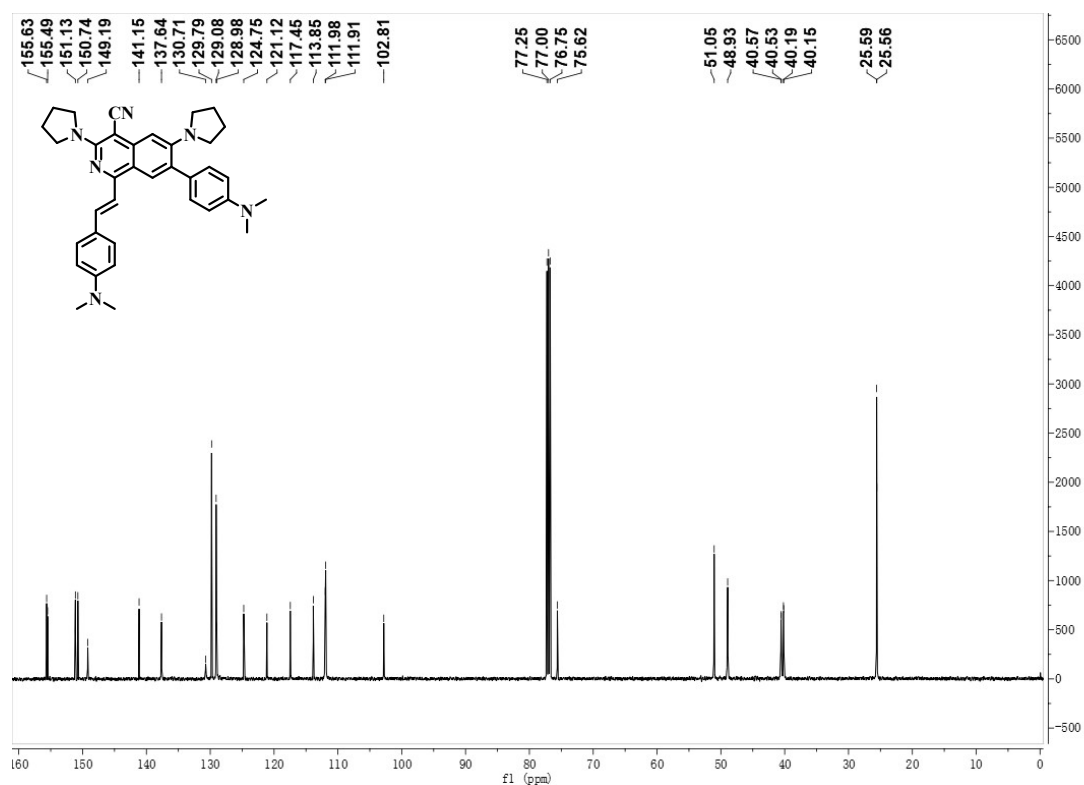

Fig. S29  $^{13}\text{C}$  NMR of FQ-DMA-7 ( $\text{CDCl}_3$ , 125 MHz).

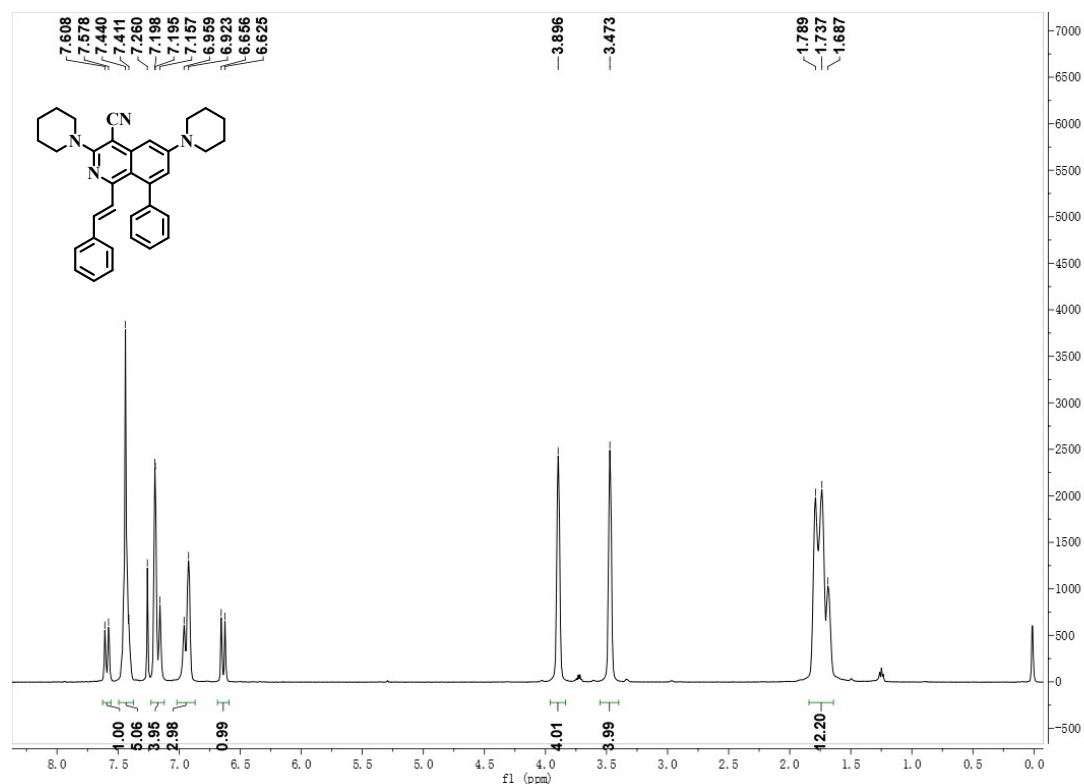

Fig. S30  $^1\text{H}$  NMR of SQ-PH-8 ( $\text{CDCl}_3$ , 500 MHz).

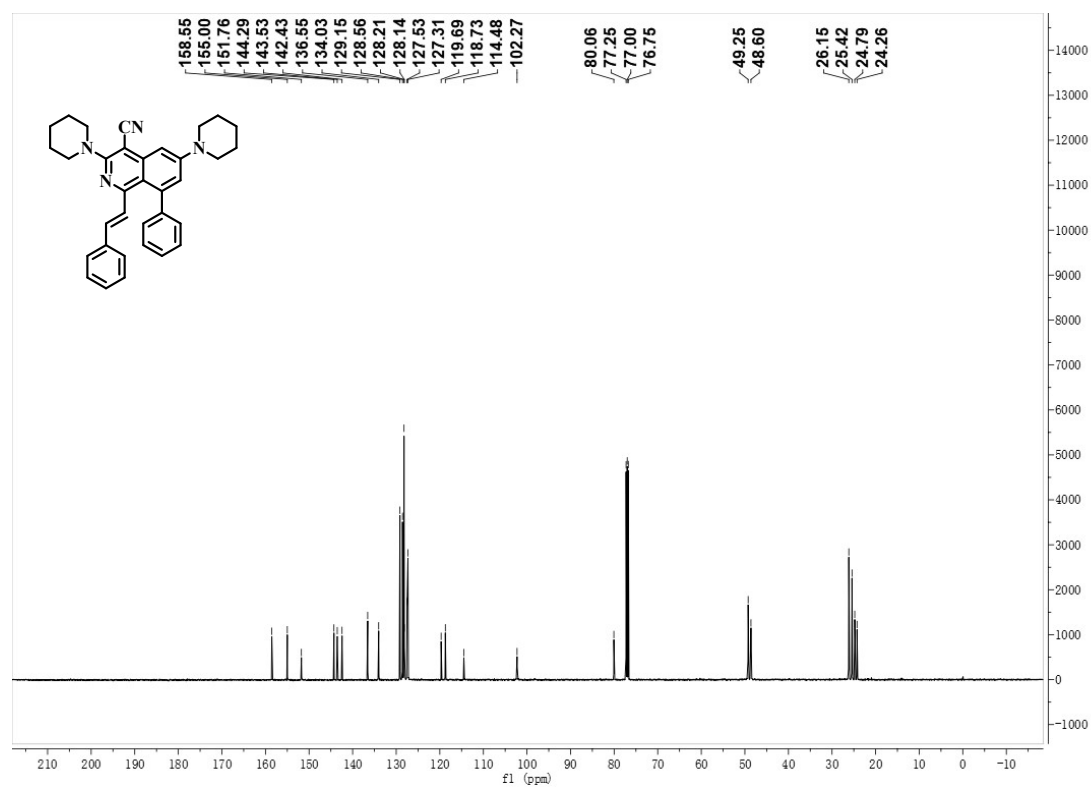

Fig. S31  $^{13}\text{C}$  NMR of SQ-PH-8 ( $\text{CDCl}_3$ , 125 MHz).



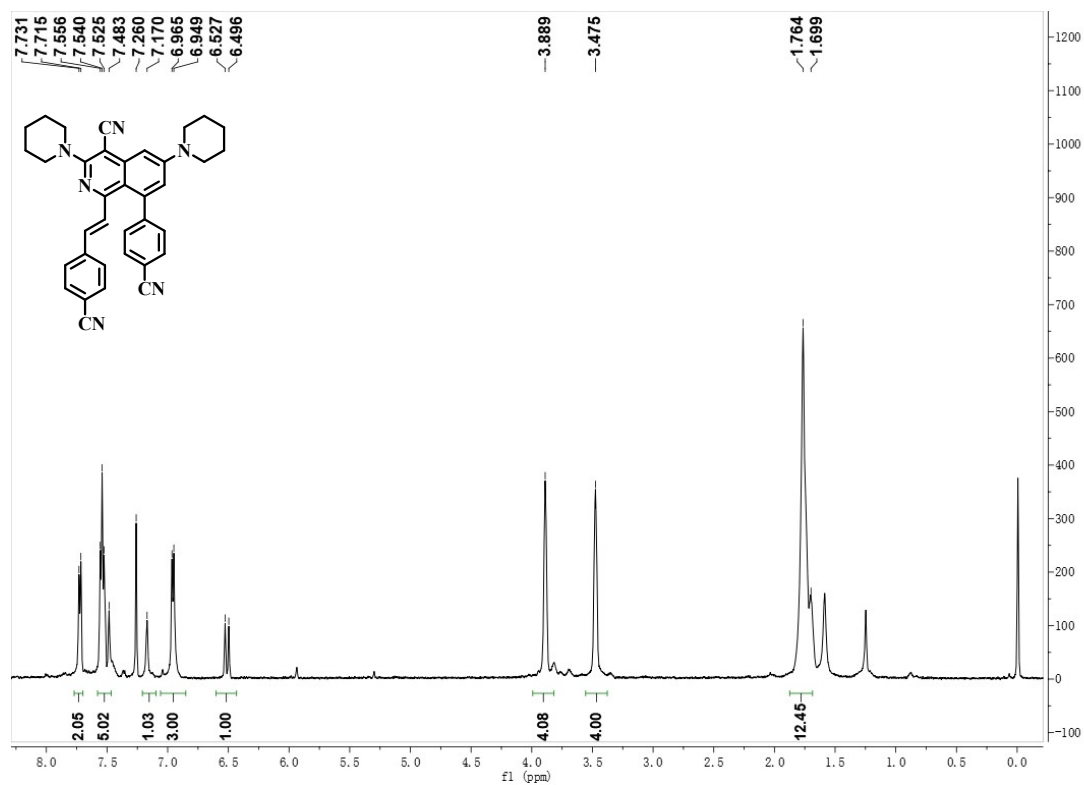

Fig. S32 <sup>1</sup>H NMR of SQ-CN-8 (CDCl<sub>3</sub>, 500 MHz).

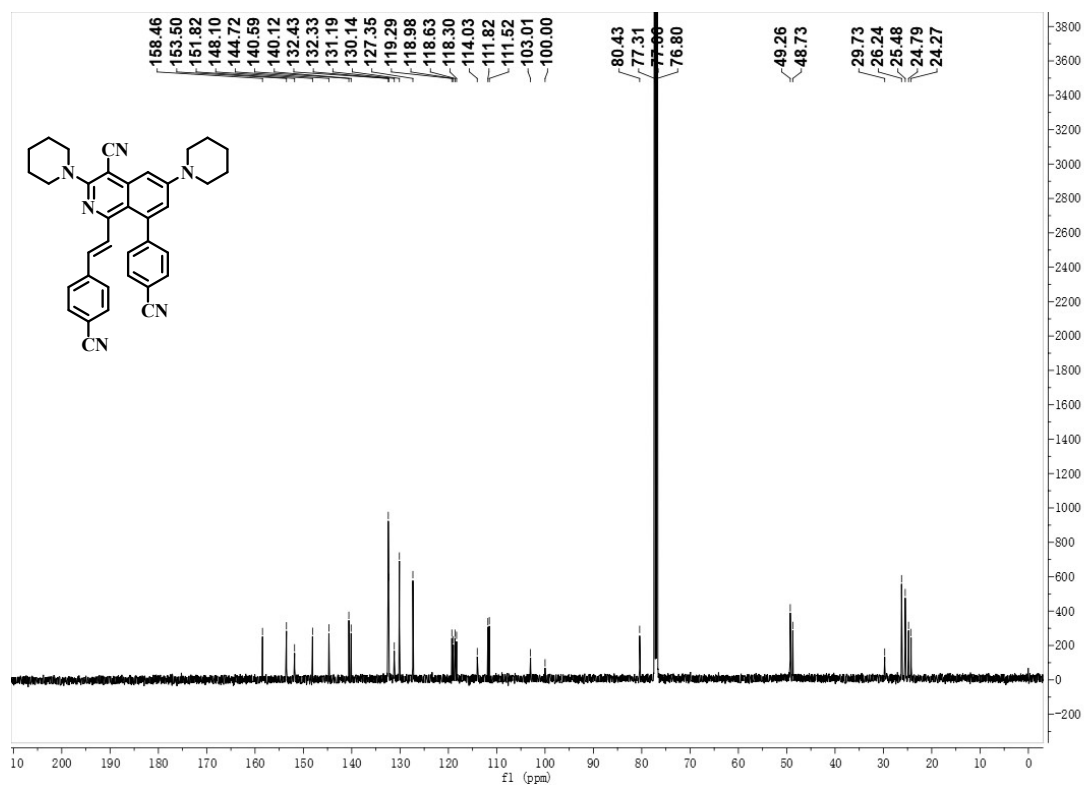

Fig. S33 <sup>13</sup>C NMR of SQ-CN-8 (CDCl<sub>3</sub>, 125 MHz).

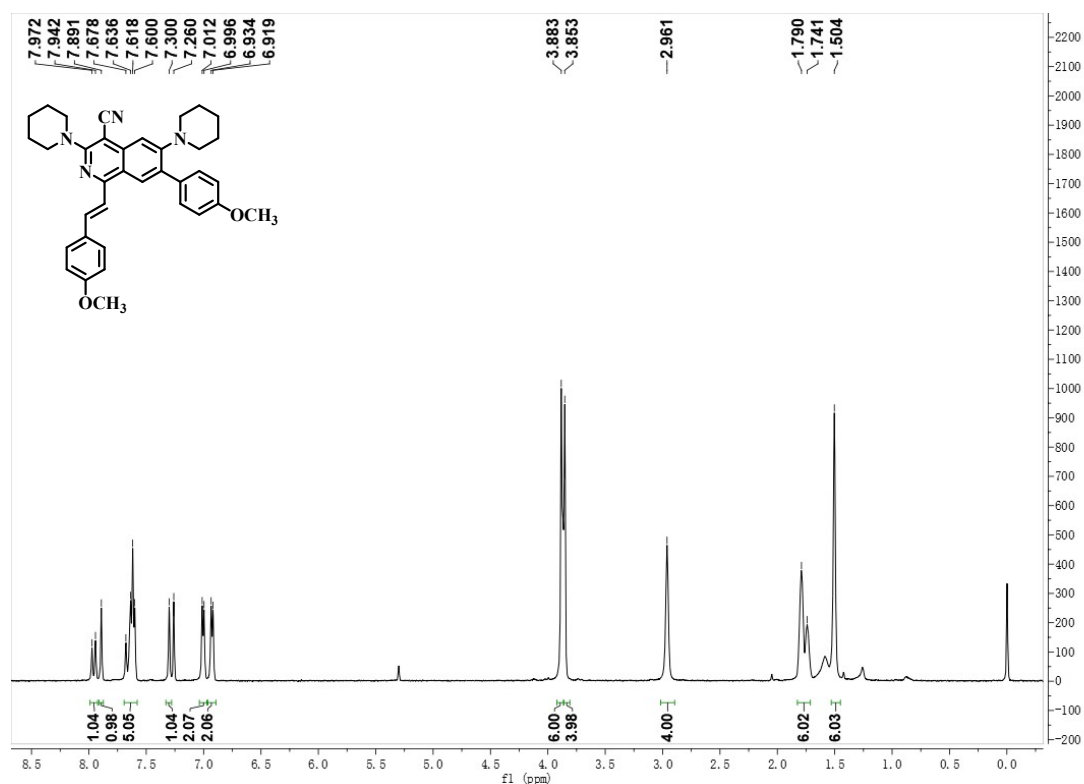

Fig. S34 <sup>1</sup>H NMR of SQ-MO-7 (CDCl<sub>3</sub>, 500 MHz).

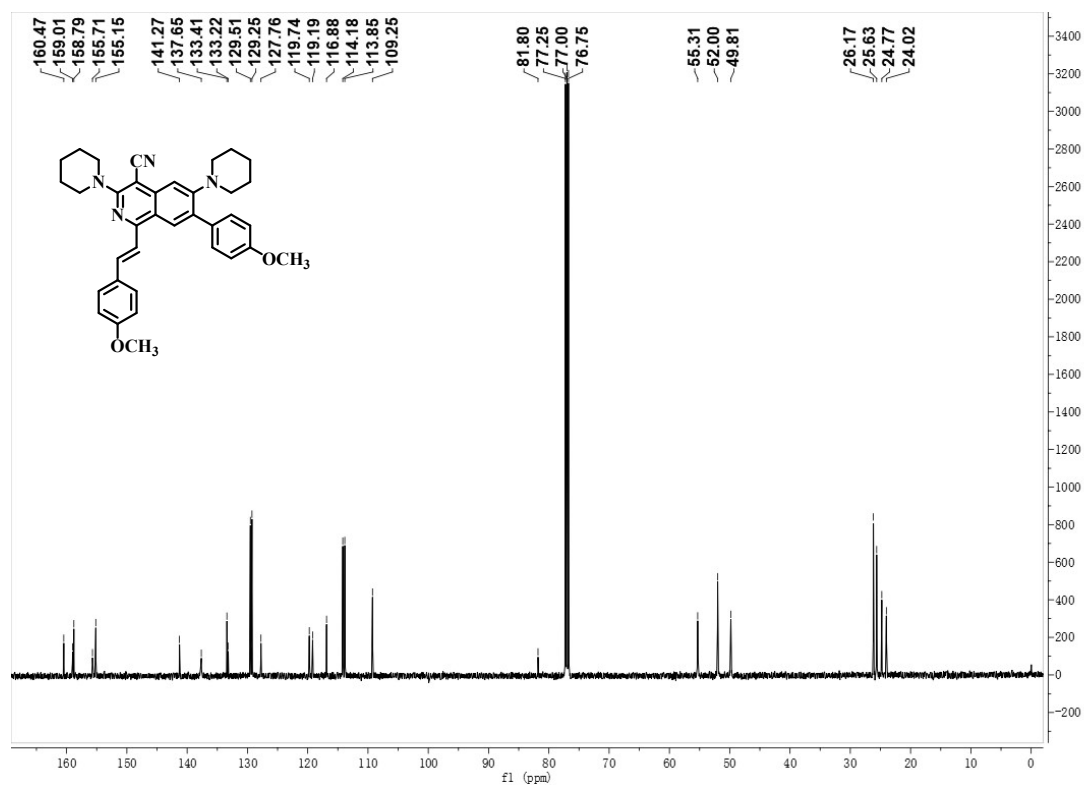

Fig. S35 <sup>13</sup>C NMR of SQ-MO-7 (CDCl<sub>3</sub>, 125 MHz).

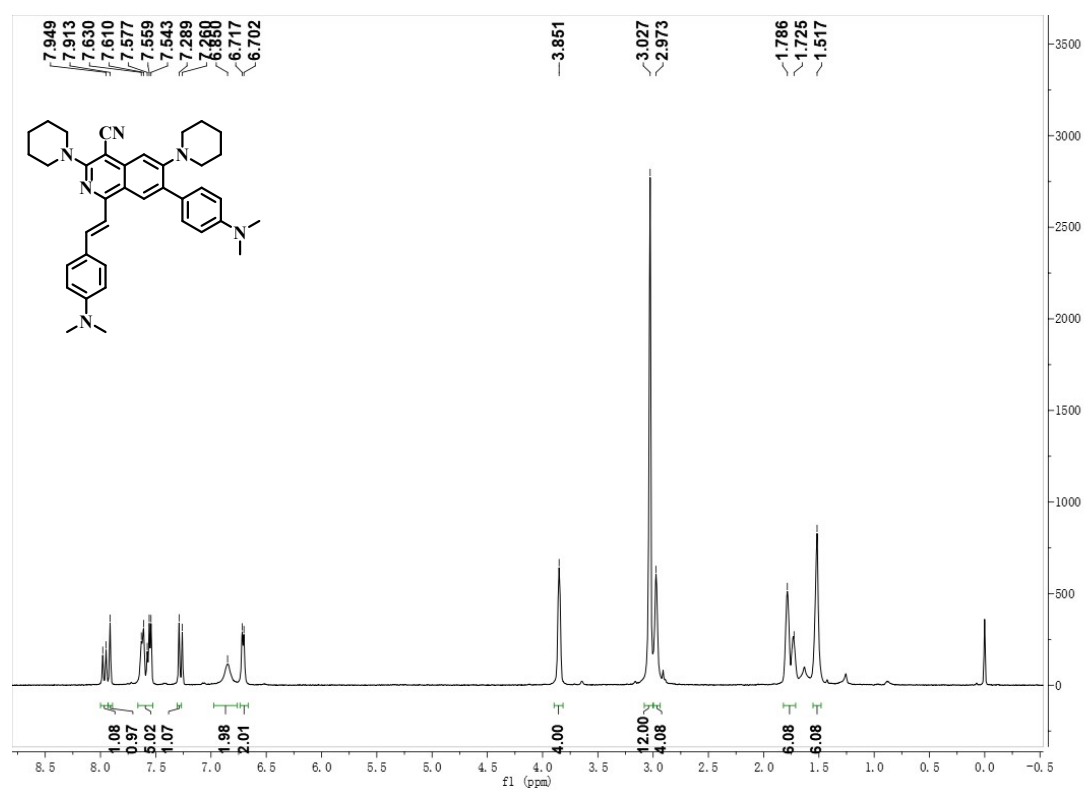

Fig. S36  $^1\text{H}$  NMR of SQ-DMA-7 ( $\text{CDCl}_3$ , 500 MHz).

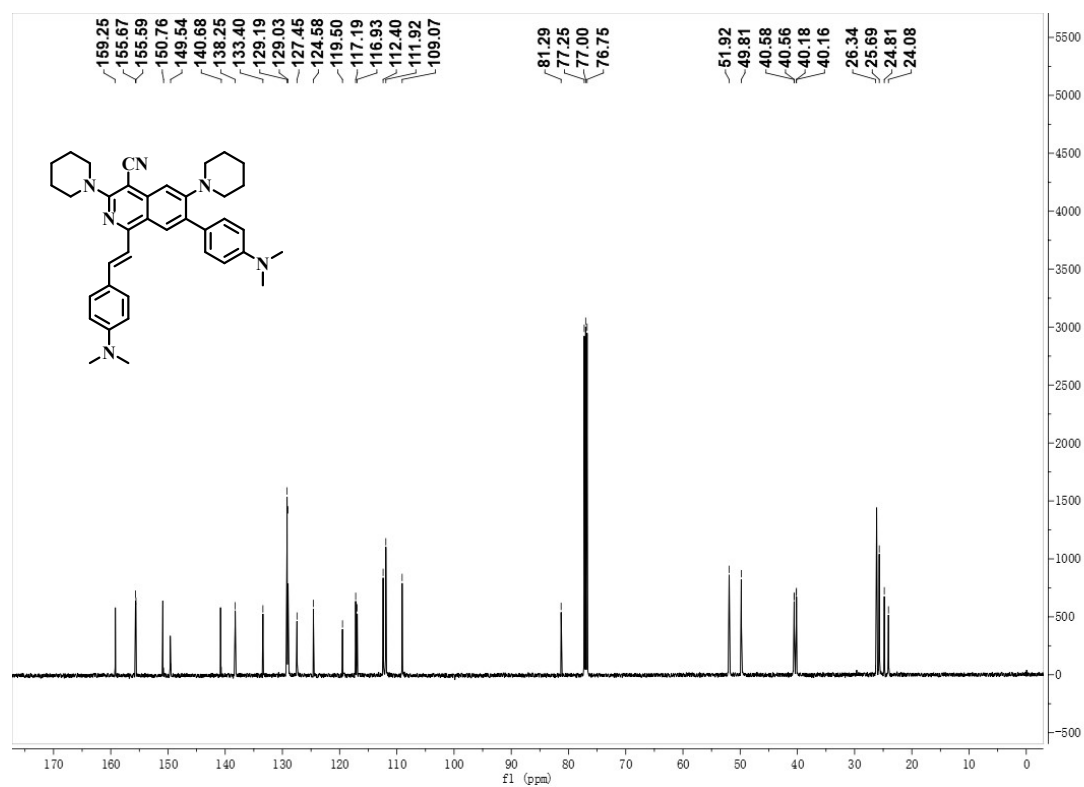

Fig. S37  $^{13}\text{C}$  NMR of SQ-DMA-7 ( $\text{CDCl}_3$ , 125 MHz).
